# Supplementary material for: Ring-opening reactions of 2-aryl-3, 4-dihydropyrans with nucleophiles
Source: Royal Society of Chemistry journal article supplement (doi:10.1039/c1cc10355e), 2011-01-01

## Electronic Supporting Information

### Ring-opening reactions of 2-aryl-3, 4-dihydropyrans with nucleophiles

Minghao Li, Conghui Tang, Jie Yang and Yanlong Gu\*

<sup>a</sup>: Institute of Physical Chemistry and Industrial Catalysis, School of Chemistry and Chemical Engineering, Hubei Key Laboratory of Material Chemistry and Service Failure, Huazhong University of Science and Technology, Huazhong University of Science and Technology (HUST), 1037 Luoyu road, Hongshan District, Wuhan 430074, China. Fax: (0)86-(0)27-87 54 45 32; E-mail: [klyl@hust.edu.cn](mailto:klyl@hust.edu.cn)

<sup>b</sup>: State Key Laboratory for Oxo Synthesis and Selective Oxidation, Lanzhou Institute of Chemical Physics, Lanzhou, 730000 (P.R. China)

#### General remarks:

4-Methylstyrene, 4-fluoro- $\alpha$ -methylstyrene, *tert*-butylstyrene, 4-methoxystyrene, 4-ethoxystyrene, 4-chloroindole, 1-methylindole, 5-methoxyindole, 4-hydroxy-6-methyl-2-pyrone, 5-bromoindole, 6-fluoroindole, Sc(OTf)<sub>3</sub>, Bi(OTf)<sub>3</sub>, Y(OTf)<sub>3</sub>, In(OTf)<sub>3</sub>, Amberlyst-15, Mn(OAc)<sub>3</sub>•2H<sub>2</sub>O, montmorillonite K10 and chloroform-*d* were purchased from Alfa Aesar Chemical Company.  $\alpha$ -Methylstyrene, MnBr<sub>2</sub>, indole, methyl acetoacetate, ethyl acetoacetate, acetylacetone, *p*-toluenesulfonic acid, 2-naphthol, FeCl<sub>3</sub> (anhydrous), SnCl<sub>4</sub>, ZnCl<sub>2</sub>, Mn(OAc)<sub>2</sub>, MnCl<sub>2</sub> (anhydrous), MnCl<sub>2</sub>•4H<sub>2</sub>O, H<sub>3</sub>BO<sub>3</sub>, CuCl<sub>2</sub>, NiCl<sub>2</sub>, DMSO, 1,4-dioxane, 1,2-dichloroethane, acetic acid, acetonitrile, nitromethane, DMF, toluene, ethyl acetate, and formaldehyde aqueous solution (37wt%) were purchased from Sinopharm Chemical Reagents Limited Company (SCRC). 2,5,6-Trisubstituted 3,4-dihydropyrans were prepared in water according to our reported method starting from olefins, 1,3-dicarbonyl compounds and formaldehyde aqueous solution.<sup>1</sup> <sup>1</sup>H and <sup>13</sup>C NMR spectra were recorded on a Bruker AV-400. Chemical shifts are expressed in ppm relative to Me<sub>4</sub>Si in CDCl<sub>3</sub>. IR spectra were recorded on a FT-IR Bruker (VERTEX 70) using KBr technology.

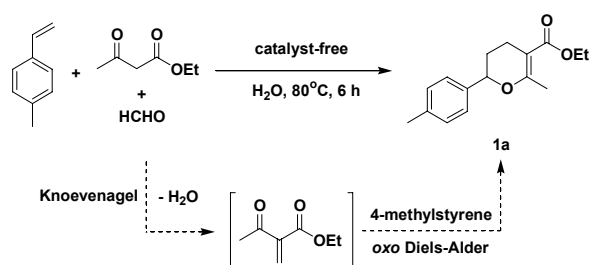

**Scheme S1.** Tandem Knoevenagel / *oxo* Diels-Alder reaction we have recently reported.

**A typical procedure for electrophilic ring-opening reaction of dihydropyran 1a with indole:**

All reactions were conducted in a 10 mL of V-type flask equipped with triangle magnetic stirring. In a typical reaction, nitromethane (1.0 ml) was mixed with **1a** (65.1 mg, 0.25 mmol), **2a** (35.1 mg, 0.30 mmol) and MnCl<sub>2</sub>·4H<sub>2</sub>O (5.0 mg, 10 mol%) under air. The mixture was stirred for 11 hours at 80 °C. After reaction, the mixture was cooled to room temperature and the desired product, **3a**, was obtained by preparative TLC using a mixed solution of ethyl acetate and petro ether as eluting solvent (the ratio of ethyl acetate/petroether is 1/6). 89.7 mg, Yield = 95%. Tests for substrate scope and the reaction of using other nucleophile were all performed according to an analogous procedure with above mentioned.

**Table S1.** Electrophilic ring-opening reaction of dihydropyran **1a** with indole **2a**.<sup>a</sup>

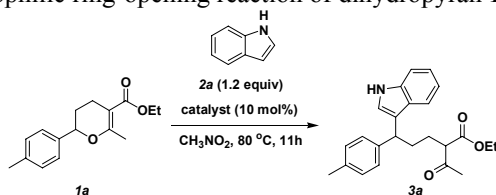

| Entry | Catalyst                          | Yield% |
|-------|-----------------------------------|--------|
| 1     | NH <sub>3</sub> SO <sub>3</sub>   | trace  |
| 2     | ZnCl <sub>2</sub>                 | 32     |
| 3     | ZrCl <sub>4</sub>                 | 13     |
| 4     | FeCl <sub>3</sub>                 | trace  |
| 5     | SnCl <sub>4</sub>                 | 10     |
| 6     | AlCl <sub>3</sub>                 | trace  |
| 7     | Y(OTf) <sub>3</sub>               | 9      |
| 8     | MnBr <sub>2</sub>                 | 36     |
| 9     | Mn(OAc) <sub>2</sub>              | trace  |
| 10    | Mn(NO <sub>3</sub> ) <sub>2</sub> | trace  |

<sup>a</sup>: the reaction was performed in 0.25 mmol scale in 1.0 ml of solvent.

**Procedure for synthesis of 7a:** The synthesis was started from preparation of dihydropyran **1c**. In a U-type reaction flask equipped with magnetic stirring, 4-methoxystyrene, **6a** (134.2 mg, 1.0 mmol), was mixed with acetylacetone (**5a**, 200.1 mg, 2.0 mmol) and formaldehyde aqueous solution (37 wt%, 202.8 mg, 2.5 mmol) under air. The mixture was stirred at 80 °C for 3 hours. After reaction, the reaction mixture was cooled to room temperature. After addition of brine (5.0 ml), the aqueous phase was extracted with a mixture of ethyl acetate and heptane (v/v = 1/1, 5.0 ml × 3). The obtained organic phases were then combined together and dried with anhydrous Na<sub>2</sub>SO<sub>4</sub>. After evaporation under reduced pressure, 229.1 mg of the desired product **1c** was obtained by silica gel column chromatography using a mixed solution of ethyl acetate and petro ether as eluting solvent (the ratio of ethyl acetate/petroether is 1/20), yield = 93%. Synthesis of **3o** was performed according to the procedure described in the part of ring-opening reaction. Finally, **3o** was obtained in 91% of yield (307.6 mg). Radical cyclization of **3o** was performed in acetic acid using a V-type flask as reactor. Thus, acetic acid (2.5 ml) was added into the flask that contain the obtained **3o** (0.85 mmol), and then, manganese triacetate dihydrate (559.6 mg, 2.1 mmol) was added. The mixture was then stirred at 60 °C for 8 hours. After reaction, Na<sub>2</sub>CO<sub>3</sub> aqueous solution (2N, 15 ml) was added and then extracted with a mixture of ethyl acetate and heptane (v/v = 1/1, 20 ml × 3). The obtained organic phases were combined together and dried with anhydrous Na<sub>2</sub>SO<sub>4</sub>. After evaporation under reduced pressure, **7a** was obtained in 72% of yield (0.61 mmol, 220.2 mg) through a

preparative TLC isolation using a mixed solution of ethyl acetate and petro ether as eluting solvent (the ratio of ethyl acetate/petroether is 1/5).

### Spectroscopic data of newly synthesized products

#### Ethyl 6-methyl-2-(p-tolyl)-3,4-dihydro-2H-pyran-5-carboxylate (1a)

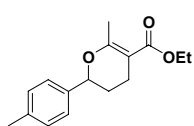

White solid, mp: 40-42 °C; <sup>1</sup>H NMR (CDCl<sub>3</sub>): 1.28 (t, J = 6.8 Hz, 3H), 1.77-1.90 (m, 1H), 2.03-2.11 (m, 1H), 2.31(t, J = 1.2 Hz, 3H), 2.34 (s, 3H), 2.35-2.50 (m, 2H), 4.17 (q, J = 7.2 Hz, 2H), 4.81 (dd, J<sub>a</sub> = 2.4 Hz, J<sub>b</sub> = 10.4 Hz, 1H), 7.16 (d, J = 8.4 Hz, 2H), 7.21 (d, J = 8.0 Hz, 2H); <sup>13</sup>C NMR: 14.5, 20.4, 21.2, 22.0, 29.2, 59.7, 78.1, 101.4, 125.9, 129.2, 137.7, 137.9, 165.0, 168.6; IR (cm<sup>-1</sup>): 2979, 2953, 2927, 2857, 1702, 1623, 1516, 1444, 1381, 1207, 1174, 1133, 1076, 1019, 960, 880, 813, 761, 581, 542; HRMS m/z (ESI) calcd for C<sub>16</sub>H<sub>20</sub>NaO<sub>3</sub> [M + Na]<sup>+</sup> 283.1310 found 283.1301.

#### Ethyl 2,6-dimethyl-2-phenyl-3,4-dihydro-2H-pyran-5-carboxylate

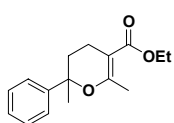

White solid, mp: 38-40 °C; <sup>1</sup>H NMR (CDCl<sub>3</sub>): 1.54 (s, 3H), 1.83-1.88 (m, 1H), 1.88-1.92 (m, 1H), 1.92-1.99 (m, 1H), 2.15-2.23 (m, 1H), 2.29-2.37 (m, 1H), 2.39 (d, J = 1.2 Hz, 3H), 4.05-4.15 (m, 2H), 7.22-7.30 (m, 3H), 7.30-7.37 (m, 2H); <sup>13</sup>C NMR: 14.4, 19.5, 20.5, 29.4, 32.5, 59.6, 79.4, 101.1, 124.4, 127.0, 128.5, 145.0, 163.4, 168.5; IR (cm<sup>-1</sup>): 3088, 3029, 2980, 2931, 2858, 1705, 1625, 1448, 1379, 1277, 1264, 1232, 1166, 1096, 1028, 1012, 764, 700; HRMS m/z (ESI) calcd for C<sub>16</sub>H<sub>20</sub>NaO<sub>3</sub> [M]<sup>+</sup> 283.1310 found 283.1296.

#### Ethyl 2-(4-fluorophenyl)-2,6-dimethyl-3,4-dihydro-2H-pyran-5-carboxylate

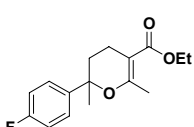

White liquid, mp: 59-61 °C; <sup>1</sup>H NMR (CDCl<sub>3</sub>): 1.24 (t, J = 7.2 Hz, 3H), 1.52 (s, 3H), 1.82-1.99 (m, 2H), 2.10-2.19 (m, 1H), 2.29-2.37 (m, 1H), 2.37 (d, J = 1.2 Hz, 3H), 4.06-4.16 (m, 2H), 7.01 (tt, J<sub>a</sub> = 3.2 Hz, J<sub>b</sub> = 8.4 Hz, 2H), 7.21-7.28 (m, 2H); <sup>13</sup>C NMR: 14.4, 19.5, 20.5, 29.3, 32.5, 59.6, 79.0, 101.1, 115.1, 115.4, 126.1, 126.1, 140.8, 140.8, 160.5, 163.0, 163.2, 168.4; IR (cm<sup>-1</sup>): 3069, 3044, 2988, 2942, 2908, 2851, 1696, 1622, 1508, 1480, 1450, 1374, 1278, 1227, 1166, 1094, 1062, 1018, 986, 877, 809, 764, 603, 512; HRMS m/z (ESI) calcd for C<sub>16</sub>H<sub>19</sub>FNaO<sub>3</sub> [M + Na]<sup>+</sup> 301.1216 found 301.1198.

#### Ethyl 2-(4-(tert-butyl)phenyl)-6-methyl-3,4-dihydro-2H-pyran-5-carboxylate

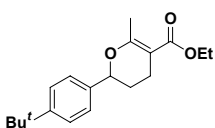

White solid, mp: 54-56 °C; <sup>1</sup>H NMR (CDCl<sub>3</sub>): 1.32 (s, 9H), 1.81-1.94 (m, 1H), 2.06-2.16 (m, 1H), 2.31 (s, 3H), 2.35-2.53 (m, 2H), 4.18 (q, J = 7.2 Hz, 2H), 4.84 (d, J = 10.0 Hz, 1H), 7.27 (d, J = 8.0 Hz, 2H), 7.40 (d, J = 8.0 Hz, 2H); <sup>13</sup>C NMR: 14.5, 20.4, 22.0, 29.1, 31.4, 34.6, 59.7, 78.1, 101.4, 125.5, 125.7, 137.8, 151.0, 165.0, 168.7; IR (cm<sup>-1</sup>): 3096, 3033, 2953, 2868, 1700, 1620, 1513, 1469, 1447, 1420, 1388, 1371, 1362, 1341, 1208, 1193, 1137, 1110, 1076, 1013, 960, 804, 880, 836, 826, 762, 579; HRMS m/z (ESI) calcd for C<sub>19</sub>H<sub>26</sub>NaO<sub>3</sub> [M + Na]<sup>+</sup> 325.1780 found 325.1767.

#### Ethyl 2-(4-methoxyphenyl)-6-methyl-3,4-dihydro-2H-pyran-5-carboxylate (1b)

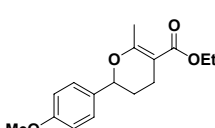

White solid, mp: 52-54 °C; <sup>1</sup>H NMR (CDCl<sub>3</sub>): 1.29 (t, J = 7.2 Hz, 3H), 1.80-1.92 (m, 1H), 2.03-2.12 (m, 1H), 2.30 (s, 3H), 2.33-2.43 (m, 1H), 2.43-2.52 (m, 1H), 3.81 (s, 3H), 4.18 (q, J = 7.2 Hz, 2H), 4.81 (dd, J<sub>a</sub> = 1.6 Hz, J<sub>b</sub> = 10.0 Hz, 1H), 6.90 (d, J = 8.8 Hz, 2H), 7.27 (d, J = 8.8 Hz, 2H); <sup>13</sup>C NMR: 14.5, 20.4, 22.1, 29.1, 55.3, 59.7, 77.9, 101.4, 113.9, 127.3, 133.0, 159.4, 165.0, 168.6; IR (cm<sup>-1</sup>): 2978, 2954, 2933, 2838, 1704, 1621, 1515, 1463,

1444, 1381, 1348, 1287, 1270, 1207, 1177, 1133, 1078, 1035, 1019, 961, 879, 828, 761, 590, 551; HRMS m/z (ESI) calcd for C<sub>16</sub>H<sub>20</sub>NaO<sub>4</sub> [M + Na]<sup>+</sup> 299.1259 found 299.1260.

**Methyl 3,4-dihydro-2-(4-methoxyphenyl)-6-methyl-2H-pyran-5-carboxylate:**<sup>2</sup> White solid, mp: 56-58 °C; Yield = 83% (ethyl acetate/petroether = 1/4), <sup>1</sup>H NMR (CDCl<sub>3</sub>): 1.71-1.83 (m, 1H), 1.95-2.04 (m, 1H), 2.22 (s, 3H), 2.23-2.43 (m, 2H), 3.63 (s, 3H), 3.72 (s, 3H), 4.72 (d, J = 8.8 Hz, 1H), 6.81 (d, J = 8.4 Hz, 2H), 7.17 (d, J = 8.4 Hz, 2H); <sup>13</sup>C NMR: 20.4, 22.0, 29.1, 51.0, 55.3, 78.0, 101.1, 113.9, 127.3, 132.9, 156.4, 165.3, 169.0.

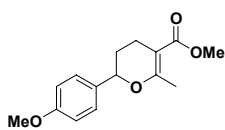

**Ethyl 2-(4-ethoxyphenyl)-6-methyl-3,4-dihydro-2H-pyran-5-carboxylate**

White solid, mp: 49-51 °C; <sup>1</sup>H NMR (CDCl<sub>3</sub>): 1.29 (t, J = 7.2 Hz, 3H), 1.41 (t, J = 7.2 Hz, 3H), 1.80-1.92 (m, 1H), 2.03-2.12 (m, 1H), 2.30 (s, 3H), 2.32-2.43 (m, 1H), 2.43-2.52 (m, 1H), 4.03 (q, J = 6.8 Hz, 2H), 4.18 (q, J = 7.2 Hz, 2H), 4.81 (dd, J<sub>a</sub> = 2.0 Hz, J<sub>b</sub> = 10.4 Hz, 1H), 6.89 (d, J = 8.4 Hz, 2H), 7.25 (d, J = 8.4 Hz, 2H); <sup>13</sup>C NMR: 14.5, 14.9, 20.4, 22.1, 29.1, 59.7, 63.5, 78.0, 101.4, 114.5, 127.3, 132.8, 158.8, 165.0, 168.7; IR (cm<sup>-1</sup>): 2981, 2931, 1704, 1622, 1515, 1477, 1445, 1383, 1346, 1270, 1246, 1207, 1175, 1133, 1074, 1048, 1016, 961, 923, 880, 826, 782, 763, 612, 551; HRMS m/z (ESI) calcd for C<sub>17</sub>H<sub>22</sub>NaO<sub>4</sub> [M + Na]<sup>+</sup> 313.1416 found 313.1402.

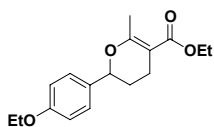

**Ethyl 2-acetyl-5-(1H-indol-3-yl)-5-(p-tolyl)pentanoate (3a)**

Red liquid; <sup>1</sup>H NMR (CDCl<sub>3</sub>): 1.08 (t, J = 7.2 Hz, 1.5H), 1.10 (t, J = 7.2 Hz, 1.5 H), 1.65-1.89 (m, 3H), 1.95-2.10 (m, 4H), 2.14 (s, 3H), 3.32 (q, J = 7.6 Hz, 1H), 3.95-4.07 (m, 3H), 6.80 (dd, J<sub>a</sub> = 2.0 Hz, J<sub>b</sub> = 8.4 Hz, 1H), 6.87 (t, J = 8.0 Hz, 1H), 6.92 (d, J = 8.0 Hz, 2H), 6.98 (t, J = 7.2 Hz, 1H), 7.04 (dd, J<sub>a</sub> = 1.6 Hz, J<sub>b</sub> = 8.0 Hz, 2H), 7.10 (d, J = 8.4 Hz, 1H), 7.31 (dd, J<sub>a</sub> = 2.4 Hz, J<sub>b</sub> = 7.6 Hz, 1H), 8.08 (s, 1H); <sup>13</sup>C NMR: 13.03, 13.0, 19.9, 25.7, 25.8, 27.6, 27.8, 32.6, 32.8, 41.2, 41.3, 58.7, 58.8, 60.3, 110.1, 118.0, 118.8, 118.2, 118.2, 120.2, 120.7, 125.7, 125.8, 126.6, 126.6, 128.0, 134.4, 135.5, 140.6, 168.8, 168.8, 202.5, 202.5; IR (cm<sup>-1</sup>): 3415, 3051, 2981, 2964, 2926, 2868, 1734, 1731, 1621, 1513, 1458, 1421, 1360, 1341, 1261, 1264, 1226, 1213, 1187, 1151, 1098, 1042, 1022, 913, 811, 744, 617, 530; HRMS m/z (ESI) calcd for C<sub>24</sub>H<sub>27</sub>NNaO<sub>3</sub> [M + Na]<sup>+</sup> 400.1889 found 400.1873.

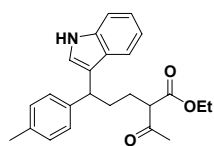

**Ethyl 2-acetyl-5-(4-methoxyphenyl)-5-(2-methyl-1H-indol-3-yl)pentanoate (3b)**

Red liquid; <sup>1</sup>H NMR (CDCl<sub>3</sub>): 1.02 (t, J = 7.2 Hz, 1.5 H), 1.08 (t, J = 7.2 Hz, 1.5 H), 1.56-1.84 (m, 2H), 1.91 (s, 1.5 H), 1.96 (s, 1.5 H), 2.00-2.11 (m, 2H), 2.12 (s, 3H), 3.29 (dd, J<sub>a</sub> = 7.6 Hz, J<sub>b</sub> = 18.0 Hz, 1H), 3.54 (s, 3H), 3.92-4.04 (m, 3H), 6.62 (d, J = 8.4 Hz, 2H), 6.84 (t, J = 6.8 Hz, 1H), 6.90 (t, J = 6.8 Hz, 1H), 7.02 (d, J = 8.0 Hz, 2H), 7.11 (d, J = 8.4 Hz, 2H), 7.34 (d, J = 8.0 Hz, 1H); <sup>13</sup>C NMR: 12.2, 12.2, 14.1, 14.2, 27.2, 27.3, 28.6, 29.0, 32.3, 32.4, 41.1, 41.2, 55.2, 59.8, 60.0, 61.5, 110.7, 113.3, 113.4, 113.7, 119.0, 119.2, 120.7, 127.6, 127.7, 128.6, 131.7, 131.8, 135.6, 137.3, 137.3, 157.7, 169.9, 170.1, 203.8; IR (cm<sup>-1</sup>): 3397, 3054, 3027, 2958, 2934, 2868, 2836, 1735, 1709, 1613, 1583, 1510, 1460, 1360, 1325, 1300, 1245, 1178, 1150, 1113, 1098, 1033, 969, 912, 831, 742, 590, 542; HRMS m/z (ESI) calcd for C<sub>25</sub>H<sub>29</sub>NNaO<sub>4</sub> [M + Na]<sup>+</sup> 430.1994 found 430.2003.

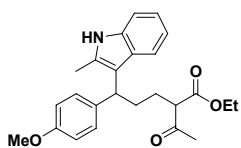

**Ethyl 2-acetyl-5-(4-methoxyphenyl)-5-(2-phenyl-1H-indol-3-yl)pentanoate (3c)**

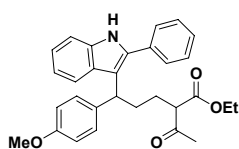

Yellow solid, mp: 78-80 °C;  $^1\text{H NMR}$  ( $\text{CDCl}_3$ ): 1.07 (t,  $J = 7.2$  Hz, 1.6 H), 1.12 (t,  $J = 7.2$  Hz, 1.4 H), 1.52-1.70 (m, 2H), 1.89 (s, 1.5H), 1.91(s, 1.5 H), 2.00-2.35 (m, 2H), 3.18 (dd,  $J_a = 8.0$  Hz,  $J_b = 16.8$  Hz, 1H), 3.66 (d,  $J = 1.6$  Hz, 3H), 3.96-4.08 (m, 2H), 4.22-4.33 (m, 1H), 6.74 (dd,  $J_a = 2.8$  Hz,  $J_b = 8.8$  Hz, 2H), 7.00 (t,  $J = 7.2$  Hz, 1H), 7.10 (t,  $J = 7.2$  Hz, 1H), 7.21-7.33 (m, 6H), 7.36 (d,  $J = 4.0$  Hz, 2H), 7.55 (s, 1H), 8.54 (bs, 1H);  $^{13}\text{C NMR}$ : 14.1, 14.2, 26.8, 27.1, 28.4, 28.9, 32.7, 33.0, 40.9, 41.2, 55.3, 59.4, 59.8, 61.4, 61.4, 111.5, 113.8, 113.9, 114.0, 119.6, 120.9, 120.9, 121.0, 122.0, 127.6, 128.0, 128.8, 128.9, 128.9, 133.2, 136.2, 136.3, 136.6, 137.5, 157.7, 169.8, 170.0, 203.6, 203.8; IR ( $\text{cm}^{-1}$ ): 3393, 3054, 3022, 2979, 2935, 2868, 1734, 1709, 1616, 1512, 1488, 1452, 1367, 1310, 1244, 1211, 1152, 1116, 1095, 1045, 1022, 811, 766, 744, 700, 547, 420; HRMS  $m/z$  (ESI) calcd for  $\text{C}_{30}\text{H}_{31}\text{NNaO}_4$  [ $\text{M} + \text{Na}$ ] $^+$  492.2151 found 492.2152.

#### Ethyl 2-acetyl-5-(1H-indol-3-yl)-5-(4-methoxyphenyl)pentanoate (3d)

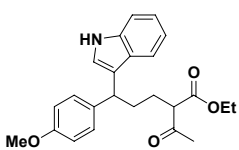

Red liquid;  $^1\text{H NMR}$  ( $\text{CDCl}_3$ ): 1.17 (t,  $J = 7.2$  Hz, 3H), 1.74-1.99 (m, 3H), 2.04-2.21 (m, 4H), 3.36-3.48 (m, 1H), 3.64 (s, 3H), 4.05-4.19 (m, 3H), 6.74 (d,  $J = 8.0$  Hz, 2H), 6.80 (d,  $J = 8.0$  Hz, 1H), 6.97 (t,  $J = 6.8$  Hz, 1H), 7.07 (t,  $J = 7.2$  Hz, 1H), 7.13 (dd,  $J_a = 2.0$  Hz,  $J_b = 6.8$  Hz, 2H), 7.19 (d,  $J = 8.0$  Hz, 1H), 7.39 (s, 1H), 8.27 (bs, 1H);  $^{13}\text{C NMR}$ : 14.2, 26.9, 27.0, 28.8, 29.0, 33.9, 34.0, 42.1, 42.1, 55.3, 59.9, 59.9, 61.6, 111.4, 113.9, 119.2, 119.4, 119.6, 121.4, 121.9, 126.9, 127.0, 128.9, 136.8, 137.0, 137.1, 158.0, 170.0, 170.1, 203.8, 203.8; IR ( $\text{cm}^{-1}$ ): 3412, 3056, 3034, 2981, 2957, 2837, 1735, 1710, 1610, 1510, 1458, 1421, 1360, 1338, 1299, 1246, 1178, 1149, 1098, 1033, 912, 836, 815, 743, 580, 541, 424; HRMS  $m/z$  (ESI) calcd for  $\text{C}_{24}\text{H}_{27}\text{NNaO}_4$  [ $\text{M} + \text{Na}$ ] $^+$  416.1838 found 416.1819.

#### Ethyl 2-acetyl-5-(4-ethoxyphenyl)-5-(1H-indol-3-yl)pentanoate (3e)

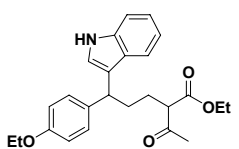

Red liquid;  $^1\text{H NMR}$  ( $\text{CDCl}_3$ ): 1.14-1.24 (m, 3H), 1.31 (m, 3H), 1.75-2.00 (m, 3H), 2.05-2.22 (m, 4H), 3.43 (t,  $J = 6.4$  Hz, 1H), 3.88 (q,  $J = 7.2$  Hz, 2H), 4.05-4.19 (m, 3H), 6.75 (dd,  $J_a = 2.0$  Hz,  $J_b = 7.2$  Hz, 2H), 6.87 (d,  $J = 7.6$  Hz, 1H), 6.98 (t,  $J = 6.4$  Hz, 1H), 7.04-7.11 (m, 1H), 7.11-7.23 (m, 3H), 7.41 (s, 1H), 8.27 (bs, 1H);  $^{13}\text{C NMR}$ : 14.2, 15.0, 26.9, 27.0, 28.8, 29.0, 33.9, 34.0, 42.1, 42.2, 59.8, 60.0, 61.6, 63.5, 111.5, 114.5, 119.2, 119.4, 119.6, 121.5, 121.9, 127.0, 128.9, 128.9, 136.8, 136.8, 137.0, 157.4, 170.0, 170.1, 203.8, 203.8; IR ( $\text{cm}^{-1}$ ): 3413, 3056, 3036, 2980, 2932, 2871, 1736, 1709, 1610, 1584, 1509, 1477, 1455, 1421, 1392, 1338, 1299, 1177, 1149, 1113, 1095, 1046, 1016, 918, 838, 813, 743, 584, 540, 421; HRMS  $m/z$  (ESI) calcd for  $\text{C}_{25}\text{H}_{29}\text{NNaO}_4$  [ $\text{M} + \text{Na}$ ] $^+$  430.1994 found 430.2001.

#### Ethyl 2-acetyl-5-(4-(tert-butyl)phenyl)-5-(1H-indol-3-yl)pentanoate (3f)

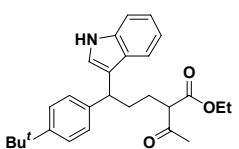

Red liquid;  $^1\text{H NMR}$  ( $\text{CDCl}_3$ ): 1.19 (t,  $J = 7.2$  Hz, 3H), 1.25 (s, 9H), 1.75-2.00 (m, 3H), 2.09 (d,  $J = 8.8$  Hz, 3H), 2.11-2.30 (m, 1H), 3.37-2.47 (m, 1H), 4.06-4.17 (m, 3H), 6.94 (dd,  $J_a = 2.0$  Hz,  $J_b = 8.8$  Hz, 1H), 6.99 (t,  $J = 6.8$  Hz, 2H), 7.08 (t,  $J = 7.2$  Hz, 1H), 7.15-7.27 (m, 5H), 7.45 (dd,  $J_a = 2.4$  Hz,  $J_b = 8.0$  Hz, 1H), 8.18 (bs, 1H);  $^{13}\text{C NMR}$ : 14.2, 14.2, 27.0, 27.1, 28.7, 29.0, 31.5, 33.9, 34.0, 34.4, 42.4, 42.4, 59.9, 60.0, 61.5, 111.3, 119.2, 119.2, 119.4, 121.4, 121.9, 125.4, 127.0, 127.0, 127.4, 127.5, 136.7, 141.8, 141.9, 148.8, 169.9, 170.0, 203.6, 203.6; IR ( $\text{cm}^{-1}$ ): 3415, 3123, 3082, 3054, 2962, 2908, 2868, 1736, 1711, 1619, 1510, 1457,

1418, 1396, 1362, 1340, 1269, 1243, 1226, 1207, 1149, 1097, 911, 841, 811, 740, 645, 610, 581, 557;  
HRMS  $m/z$  (ESI) calcd for  $C_{27}H_{33}NNaO_3$   $[M + Na]^+$  442.2358 found 442.2374.

**Ethyl 2-acetyl-5-(4-fluorophenyl)-5-(1H-indol-3-yl)hexanoate (3g)**

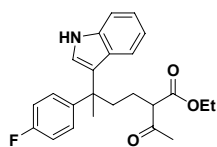

Red liquid;  $^1H$  NMR ( $CDCl_3$ ): 1.14 (t,  $J = 7.2$  Hz, 1.4H), 1.21 (t,  $J = 6.8$  Hz, 1.6 H), 1.43-1.60 (m, 0.6 H), 1.66 (d,  $J = 2.4$  Hz, 3H), 1.70-1.87 (m, 1.4 H), 2.00 (s, 1.5 H), 2.03-2.08 (m, 0.4 H), 2.09 (s, 1.5 H), 2.10-2.34 (m, 1.6 H), 3.32 (q,  $J = 7.2$  Hz, 1H), 4.02-4.14 (m, 2H), 6.80-6.87 (m, 3H), 6.90-6.94 (m, 1H), 7.02-7.08 (m, 2H), 7.19 (dd,  $J_a = 5.6$  Hz,  $J_b = 8.8$  Hz, 2H), 7.22-7.26 (m, 1H), 8.34 (bs, 1H);  $^{13}C$  NMR: 14.1, 14.2, 23.7, 23.8, 27.7, 28.0, 28.6, 29.0, 38.8, 38.9, 41.9, 41.9, 60.2, 60.3, 61.6, 111.5, 111.5, 114.6, 114.9, 118.9, 118.9, 121.0, 121.7, 121.7, 121.8, 122.0, 123.0, 123.3, 125.8, 125.8, 128.5, 128.5, 128.5, 128.6, 137.3, 144.2, 144.3, 144.3, 144.3, 159.9, 162.3, 170.0, 170.0, 203.8; IR ( $cm^{-1}$ ): 3412, 3057, 2972, 2936, 2872, 1736, 1709, 1647, 1602, 1507, 1458, 1419, 1365, 1337, 1226, 1159, 1102, 1016, 911, 836, 741, 587, 541, 424; HRMS  $m/z$  (ESI) calcd for  $C_{24}H_{26}FNNaO_3$   $[M + Na]^+$  418.1794 found 418.1802.

**Ethyl 2-acetyl-5-(1H-indol-3-yl)-5-phenylhexanoate (3h)**

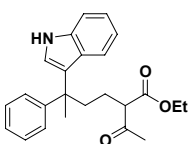

Red liquid;  $^1H$  NMR ( $CDCl_3$ ): 1.09 (t,  $J = 7.2$  Hz, 1.4 H), 1.16 (t,  $J = 7.2$  Hz, 1.6 H), 1.46-1.63 (m, 0.6 H), 1.66 (s, 3H), 1.68-1.88 (m, 1.4 H), 1.94 (s, 1.4 H), 2.02 (s, 1.6 H), 2.04-2.28 (m, 2H), 3.21-3.30 (m, 1H), 3.97-4.15 (m, 2H), 6.77 (t,  $J = 7.2$  Hz, 1H), 6.90 (d,  $J = 7.6$  Hz, 1H), 6.96-7.04 (m, 2H), 7.07 (t,  $J = 6.8$  Hz, 1H), 7.14 (t,  $J = 7.2$  Hz, 2H), 7.21 (t,  $J = 7.6$  Hz, 3H), 8.15 (bs, 1H);  $^{13}C$  NMR: 14.1, 14.2, 23.8, 23.9, 27.5, 27.9, 28.5, 28.8, 38.7, 38.9, 42.3, 42.3, 60.3, 60.4, 61.5, 111.4, 118.9, 118.9, 121.2, 121.6, 121.7, 121.8, 122.0, 123.3, 123.6, 125.9, 126.0, 126.0, 127.0, 127.0, 128.1, 137.2, 148.5, 148.6, 170.0, 170.0, 203.8; IR ( $cm^{-1}$ ): 3415, 3056, 2971, 2936, 2872, 1735, 1701, 1616, 1544, 1491, 1457, 1418, 1363, 1337, 1263, 1243, 1221, 1103, 1018, 910, 742, 702, 586, 516, 426; HRMS  $m/z$  (ESI) calcd for  $C_{24}H_{27}NNaO_3$   $[M + Na]^+$  400.1889 found 400.1877.

**Ethyl 2-acetyl-5-(4-methoxyphenyl)-5-(1-methyl-1H-indol-3-yl)pentanoate (3i)**

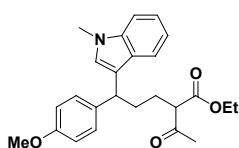

Red liquid;  $^1H$  NMR ( $CDCl_3$ ): 1.19 (t,  $J = 8.8$  Hz, 3H), 1.75-1.98 (m, 3H), 2.04-2.28 (m, 4H), 3.41 (td,  $J_a = 7.6$  Hz,  $J_b = 10.4$  Hz, 1H), 3.60 (d,  $J = 2.0$  Hz, 3H), 3.66 (s, 3H), 4.06-4.17 (m, 3H), 6.77 (dd,  $J_a = 1.6$  Hz,  $J_b = 8.8$  Hz, 2H), 6.82 (d,  $J = 8.0$  Hz, 1H), 6.97 (dd,  $J_a = 7.2$  Hz,  $J_b = 8.0$  Hz, 1H), 7.12 (t,  $J = 7.6$  Hz, 1H), 7.15-7.22 (m, 3H), 7.40 (dd,  $J_a = 2.8$  Hz,  $J_b = 8.0$  Hz, 1H);  $^{13}C$  NMR: 14.2, 14.2, 26.9, 27.0, 28.7, 28.9, 32.7, 34.0, 34.1, 42.0, 42.1, 55.2, 59.9, 60.0, 61.4, 109.3, 113.9, 118.4, 118.6, 118.8, 119.6, 121.7, 126.0, 127.4, 127.4, 128.8, 128.8, 137.0, 137.1, 137.4, 158.0, 169.9, 169.9, 203.3; IR ( $cm^{-1}$ ): 3053, 2934, 2872, 2835, 1738, 1713, 1610, 1510, 1467, 1369, 1329, 1300, 1208, 1178, 1151, 1094, 1034, 814, 742, 566; HRMS  $m/z$  (ESI) calcd for  $C_{25}H_{29}NNaO_4$   $[M + Na]^+$  430.1994 found 430.1982.

**Ethyl 2-acetyl-5-(5-bromo-1H-indol-3-yl)-5-(p-tolyl)pentanoate (3j)**

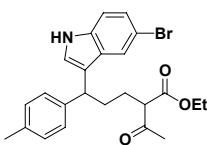

Red liquid;  $^1H$  NMR ( $CDCl_3$ ): 1.20 (q,  $J = 7.2$  Hz, 3H), 1.73-2.00 (m, 3H), 2.02-2.11 (m, 1H), 2.13 (d,  $J = 9.6$  Hz, 3H), 2.24 (s, 3H), 3.40-3.50 (m, 1H), 3.99-4.06 (m, 1H), 4.07-4.18 (m, 2H), 6.94 (dd,  $J_a = 2.0$  Hz,  $J_b = 7.2$  Hz, 1H), 7.02 (d,  $J = 8.0$  Hz, 2H), 7.06 (d,  $J = 8.8$  Hz, 1H), 7.08-7.15 (m, 3H), 7.52 (dd,  $J_a = 2.0$  Hz,  $J_b = 3.2$

Hz, 1H), 8.43 (bs, 1H);  $^{13}\text{C}$  NMR: 14.2, 21.1, 26.8, 27.0, 28.9, 29.1, 33.8, 34.0, 42.2, 42.4, 59.7, 59.9, 61.6, 61.6, 112.4, 112.9, 118.9, 119.1, 121.7, 122.6, 122.7, 124.7, 127.6, 127.6, 128.7, 128.7, 129.3, 135.3, 135.3, 135.9, 141.3, 141.4, 169.9, 170.0, 203.8; IR ( $\text{cm}^{-1}$ ): 3413, 3124, 2980, 2926, 2866, 1734, 1706, 1613, 1565, 1511, 1456, 1419, 1361, 1333, 1211, 1148, 1098, 1048, 1020, 909, 883, 862, 796, 731, 594, 420; HRMS  $m/z$  (ESI) calcd for  $\text{C}_{24}\text{H}_{26}\text{BrNNaO}_3$   $[\text{M} + \text{Na}]^+$  478.0994 found 478.0980.

**Ethyl 2-acetyl-5-(5-methoxy-1H-indol-3-yl)-5-(4-methoxyphenyl)pentanoate (3k)**

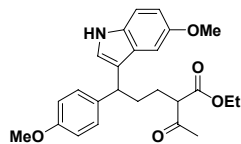

Red liquid;  $^1\text{H}$  NMR ( $\text{CDCl}_3$ ): 1.23 (q,  $J = 7.2$  Hz, 3H), 1.76-2.00 (m, 3H), 2.07-2.20 (m, 4H), 3.44 (q,  $J = 8.0$  Hz, 1H), 3.72 (s, 3H), 3.75 (s, 3H), 4.06 (t,  $J = 8.0$  Hz, 1H), 4.16 (q,  $J = 7.2$  Hz, 2H), 6.75-6.81 (m, 3H), 6.84 (s, 1H), 7.14 (d,  $J = 8.8$  Hz, 1H), 7.17 (dd,  $J_a = 1.6$  Hz,  $J_b = 8.4$  Hz, 2H), 8.19 (bs, 1H);  $^{13}\text{C}$  NMR: 14.1, 14.2, 26.8, 26.9, 28.7, 28.9, 33.7, 33.9, 42.0, 42.0, 55.2, 55.9, 59.8, 59.9, 61.5, 101.5, 111.8, 111.9, 113.8, 119.2, 119.4, 122.1, 127.3, 127.3, 128.8, 128.8, 131.8, 136.7, 136.9, 153.6, 157.9, 169.9, 169.9, 203.5; IR ( $\text{cm}^{-1}$ ): 3415, 3030, 2991, 2937, 2868, 2834, 1735, 1710, 1611, 1583, 1510, 1483, 1456, 1360, 1297, 1246, 1175, 1148, 1095, 1033, 924, 830, 799, 773, 732, 424; HRMS  $m/z$  (ESI) calcd for  $\text{C}_{25}\text{H}_{29}\text{NNaO}_5$   $[\text{M} + \text{Na}]^+$  446.1943 found 446.1969.

**Ethyl 2-acetyl-5-(4-chloro-1H-indol-3-yl)-5-(4-methoxyphenyl)pentanoate (3l)**

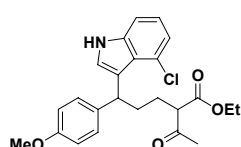

Red liquid;  $^1\text{H}$  NMR ( $\text{CDCl}_3$ ): 1.18 (q,  $J = 7.2$  Hz, 3H), 1.78-2.10 (m, 3H), 2.04-2.20 (m, 4H), 3.47 (q,  $J = 7.2$  Hz, 1H), 3.66 (s, 3H), 4.13 (q,  $J = 6.8$  Hz, 2H), 4.78 (t,  $J = 7.2$  Hz, 1H), 6.76 (dd,  $J_a = 2.0$  Hz,  $J_b = 8.4$  Hz, 2H), 6.87 (dd,  $J_a = 3.6$  Hz,  $J_b = 18.0$  Hz, 1H), 6.92-6.99 (m, 2H), 6.98 (d,  $J = 7.6$  Hz, 1H), 7.03 (dd,  $J_a = 4.8$  Hz,  $J_b = 8.4$  Hz, 2H), 8.61 (bs, 1H);  $^{13}\text{C}$  NMR: 14.2, 14.2, 27.1, 27.1, 29.0, 29.1, 35.6, 35.8, 41.4, 41.5, 55.2, 59.8, 60.0, 61.6, 61.6, 110.4, 113.8, 113.8, 120.0, 120.3, 120.6, 122.4, 123.2, 123.5, 123.6, 126.0, 129.2, 129.2, 137.1, 137.4, 138.1, 157.8, 157.9, 170.0, 170.1, 204.0, 204.1; IR ( $\text{cm}^{-1}$ ): 3395, 3125, 3101, 3062, 2979, 2958, 2935, 2867, 2836, 1735, 1710, 1611, 1510, 1482, 1460, 1424, 1359, 1338, 1300, 1247, 1210, 1181, 1147, 1111, 1094, 1034, 936, 820, 778, 741, 550; HRMS  $m/z$  (ESI) calcd for  $\text{C}_{24}\text{H}_{26}\text{ClNNaO}_4$   $[\text{M} + \text{Na}]^+$  450.1448 found 450.1437.

**Ethyl 2-acetyl-5-(6-fluoro-1H-indol-3-yl)-5-(p-tolyl)pentanoate (3m)**

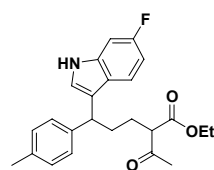

Red liquid;  $^1\text{H}$  NMR ( $\text{CDCl}_3$ ): 1.21 (t,  $J = 7.2$  Hz, 3H), 1.76-2.01 (m, 1.4 H), 2.01-2.10 (m, 1.6 H), 2.10-2.20 (m, 4H), 2.25 (s, 3H), 3.46 (q,  $J = 6.4$  Hz, 1H), 4.12 (dd,  $J_a = 7.2$  Hz,  $J_b = 15.2$  Hz, 2H), 4.80 (t,  $J = 6.8$  Hz, 1H), 6.88 (dd,  $J_a = 2.4$  Hz,  $J_b = 18.4$  Hz, 1H), 6.82-6.89 (m, 2H), 6.94 (dd,  $J_a = 1.6$  Hz,  $J_b = 8.0$  Hz, 2H), 7.00 (d,  $J = 6.8$  Hz, 1H), 7.15 (dd,  $J_a = 4.8$  Hz,  $J_b = 8.0$  Hz, 2H), 8.57 (bs, 1H);  $^{13}\text{C}$  NMR: 14.2, 14.2, 21.1, 27.1, 27.1, 28.9, 29.1, 35.6, 35.7, 41.8, 41.9, 59.9, 60.0, 61.5, 61.6, 110.3, 119.8, 120.2, 120.6, 122.3, 123.2, 123.5, 123.6, 126.1, 128.1, 128.2, 129.1, 129.2, 135.5, 135.6, 138.1, 141.9, 142.2, 170.0, 170.1, 203.9, 204.0; IR ( $\text{cm}^{-1}$ ): 3396, 2980, 2960, 2933, 2867, 1735, 1710, 1615, 1561, 1512, 1483, 1425, 1359, 1339, 1268, 1245, 1209, 1186, 1147, 1113, 1094, 1020, 936, 911, 815, 771, 740, 420; HRMS  $m/z$  (ESI) calcd for  $\text{C}_{24}\text{H}_{26}\text{FNNaO}_3$   $[\text{M} + \text{Na}]^+$  418.1794 found 418.1789.

**Methyl 2-acetyl-5-(1H-indol-3-yl)-5-(4-methoxyphenyl)pentanoate (3n)**



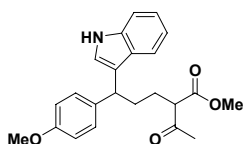

Brown liquid;  $^1\text{H NMR}$  ( $\text{CDCl}_3$ ): 1.78-1.94 (m, 3H), 2.18-2.15 (m, 4H), 3.42-3.48 (m, 1H), 3.67 (d,  $J = 2.8$  Hz, 3H), 3.73 (s, 3H), 4.10 (t,  $J = 6.8$  Hz, 1H), 6.77 (dd,  $J_a = 1.6$  Hz,  $J_b = 8.4$  Hz, 2H), 6.94-7.01 (m, 2H), 7.10 (t,  $J = 7.6$  Hz, 1H), 7.16 (dd,  $J_a = 2.8$  Hz,  $J_b = 8.8$  Hz, 1H), 7.26 (d,  $J = 8.0$  Hz, 1H), 7.39 (dd,  $J_a = 2.8$  Hz,  $J_b = 8.0$  Hz, 1H), 8.13 (s, 1H);  $^{13}\text{C NMR}$ : 26.8, 26.9, 28.7, 28.9, 33.7, 33.9, 41.9, 42.0, 52.4, 55.2, 59.6, 59.7, 111.2, 113.8, 119.2, 119.3, 119.4, 119.6, 121.1, 121.9, 126.8, 126.9, 128.7, 136.6, 136.7, 136.9, 157.9, 170.3, 170.4, 203.5; IR ( $\text{cm}^{-1}$ ): 3411, 3001, 2953, 1711, 1610, 1510, 1457, 1358, 1246, 1177, 1150, 1034, 910, 816, 742, 648, 541; HRMS  $m/z$  (ESI) calcd for  $\text{C}_{23}\text{H}_{25}\text{NNaO}_4$  [ $\text{M} + \text{Na}$ ] $^+$  402.1681 found 402.1864.

**3-(3-(1H-indol-3-yl)-3-(4-methoxyphenyl)propyl)pentane-2,4-dione and (Z)-3-(1-hydroxyethylidene)-6-(1H-indol-3-yl)-6-(4-methoxyphenyl)hexan-2-one (3o)**

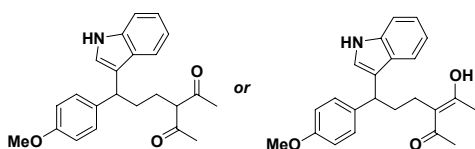

Brown liquid;  $^1\text{H NMR}$  ( $\text{CDCl}_3$ ): 1.81-1.89 (m, 2H), 1.89-2.00 (m, 2.1H), 2.03-2.04 (m, 2.1H), 2.03-2.04 (m, 2.3), 2.08 (s, 2.5H), 2.13-2.30 (m, 1.1H), 3.60 (t,  $J = 6.8$  Hz, 0.68H), 3.71 (d,  $J = 8.0$  Hz, 3H), 4.08 (t,  $J = 7.6$  Hz, 1H), 6.76-6.81 (m, 2H), 6.93-7.02 (m, 2H), 7.10 (t,  $J = 6.8$  Hz, 1H), 7.14-7.25 (m, 3H), 7.40 (dd,  $J_a = 16.8$  Hz,  $J_b = 8.0$  Hz, 1H), 8.17 (d,  $J = 19.2$  Hz, 1H);  $^{13}\text{C NMR}$ : 22.8, 26.2, 26.9, 29.0, 29.3, 33.9, 37.0, 42.0, 42.2, 55.2, 68.7, 110.4, 111.2, 111.3, 113.8, 119.2, 119.3, 119.5, 120.1, 121.1, 122.0, 112.1, 126.8, 128.7, 128.8, 136.6, 136.8, 157.8, 157.9, 191.2, 204.8; IR ( $\text{cm}^{-1}$ ): 3411, 3056, 3034, 3001, 2953, 2932, 2863, 2835, 1722, 1696, 1609, 1583, 1510, 1457, 1419, 1358, 1338, 1300, 1246, 1177, 1150, 1107, 1033, 909, 834, 741, 580; HRMS  $m/z$  (ESI) calcd for  $\text{C}_{23}\text{H}_{25}\text{NNaO}_3$  [ $\text{M} + \text{Na}$ ] $^+$  386.1732 found 386.1724.

**(E)-Ethyl 2-acetyl-5-(4-methoxyphenyl)pent-4-enoate (4a)**

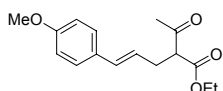

White solid, mp = 41-42°C;  $^1\text{H NMR}$  ( $\text{CDCl}_3$ ): 1.25 (t,  $J = 6.8$  Hz, 3H), 2.25 (s, 3H), 2.72 (t,  $J = 7.2$  Hz, 2H), 3.57 (t,  $J = 7.6$  Hz, 1H), 3.79 (s, 3H), 4.19 (q,  $J = 7.2$  Hz, 2H), 5.96 (dt,  $J_a = 15.6$  Hz,  $J_b = 7.6$  Hz, 1H), 6.39 (d,  $J = 15.6$  Hz, 1H), 6.82 (d,  $J = 8.4$  Hz, 2H), 7.24 (d,  $J = 8.4$  Hz, 2H);  $^{13}\text{C NMR}$ : 14.1, 29.2, 31.5, 55.2, 59.7, 61.4, 113.9, 123.4, 127.3, 129.8, 132.1, 159.0, 169.2, 202.5; IR ( $\text{cm}^{-1}$ ): 3414, 3031, 2986, 2965, 2916, 2842, 1736, 1710, 1607, 1511, 1457, 1422, 1367, 1303, 1251, 1217, 1175, 1143, 1030, 974, 838, 795; HRMS  $m/z$  (ESI) calcd for  $\text{C}_{16}\text{H}_{20}\text{NaO}_4$  [ $\text{M} + \text{Na}$ ] $^+$  299.1259 found 299.1256.

**Ethyl 2-acetyl-5-(2-hydroxynaphthalen-1-yl)-5-(p-tolyl)pentanoate (6a)**

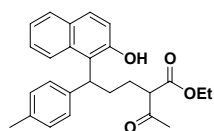

Yellow pale liquid;  $^1\text{H NMR}$  ( $\text{CDCl}_3$ ): 1.16 (t,  $J = 7.2$  Hz, 1.4 H), 1.21 (t,  $J = 7.2$  Hz, 1.6 H), 1.60-1.82 (m, 1H), 1.83-2.02 (m, 1H), 2.04 (s, 1.4 H), 2.08 (s, 1.6 H), 2.27 (s, 3H), 2.30-2.47 (m, 2H), 3.39 (t,  $J = 6.8$  Hz, 0.46 H), 3.48 (t,  $J = 7.2$  Hz, 0.54 H), 4.05-4.20 (m, 2H), 4.96-5.08 (m, 1H), 5.75 (bs, 1H), 6.99 (d,  $J = 8.8$  Hz, 1H), 7.05 (d,  $J = 7.6$  Hz, 1H), 7.23 (d,  $J = 7.6$  Hz, 2H), 7.29 (d,  $J = 6.8$  Hz, 1H), 7.34-7.48 (m, 1H), 7.61 (d,  $J = 8.8$  Hz, 1H), 7.74 (d,  $J = 8.0$  Hz, 1H), 7.99 (bs, 1H);  $^{13}\text{C NMR}$ : 14.0, 14.1, 21.0, 26.8, 27.0, 28.5, 28.9, 29.5, 29.6, 59.7, 60.0, 61.5, 61.5, 121.7, 121.9, 123.0, 127.4, 128.9, 128.9, 129.4, 152.0, 152.0, 169.9, 170.0, 203.9; IR ( $\text{cm}^{-1}$ ): 3441, 3053, 2980, 2963, 2923, 2870, 1731, 1707, 1625, 1512, 1437, 1369, 1361, 1269, 1148, 1021, 812, 747, 418; HRMS  $m/z$  (ESI) calcd for  $\text{C}_{26}\text{H}_{28}\text{NaO}_4$  [ $\text{M} + \text{Na}$ ] $^+$  427.1885 found 427.1894.

**Ethyl 2-acetyl-5-(4-methoxyphenyl)-5-(6-methyl-2,4-dioxo-3,4-dihydro-2H-pyran-3-yl)pentanoate**

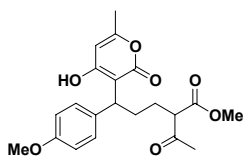

**(8a)** Colorless liquid; <sup>1</sup>H NMR (CDCl<sub>3</sub>): 1.17 (m, 3H), 1.79 (m, 2H), 1.98 (m, 1H), 2.05 (s, 3H), 2.13 (s, 3H), 2.24 (m, 1H), 3.44 (dt, J<sub>a</sub> = 18.8 Hz, J<sub>b</sub> = 6.8 Hz, 1H), 3.66 (s, 3H), 4.09 (q, J = 6.8 Hz, 2H), 4.18 (m, 1H), 5.98 (s, 1H), 6.70 (d, J = 8.4 Hz, 2H), 7.28 (d, J = 8.0 Hz, 2H); <sup>13</sup>C NMR: 14.0, 19.5, 26.9, 27.0, 28.8, 28.9, 29.0, 29.1, 38.7, 39.0, 55.1, 59.6, 59.9, 61.4, 101.7, 104.5, 113.4, 128.8, 128.9, 135.4, 135.5, 157.9, 160.6, 166.9, 167.7, 169.8, 169.9, 203.6; IR (cm<sup>-1</sup>): 3065, 3032, 2958, 2932, 2658, 1737, 1712, 1671, 1634, 1574, 1511, 1447, 1404, 1375, 1178, 1035, 997, 913, 832, 732, 623, 547; HRMS m/z (ESI) calcd for C<sub>21</sub>H<sub>24</sub>NaO<sub>7</sub> [M + Na]<sup>+</sup> 411.1420 found 411.1412.

**1,1'-(1-(4-Methoxyphenyl)-2,3,4,9-tetrahydro-1H-carbazole-4,4-diyl)diethanone (7a)**

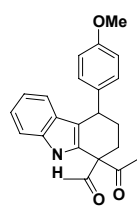

Brown solid, mp = 140-142 °C; <sup>1</sup>H NMR (CDCl<sub>3</sub>): 1.75-1.83 (m, 1H), 2.18-2.25 (m, 1H), 2.27 (s, 3H), 2.28 (s, 3H), 2.33-2.39 (m, 1H), 2.55-2.61 (m, 1H), 3.76 (s, 3H), 4.21 (t, J = 6.4Hz, 1H), 6.80 (dt, J<sub>a</sub> = 2.8Hz, J<sub>b</sub> = 8.8Hz, 2H), 6.91 (m, 2H), 7.03 (d, J = 7.2Hz, 2H), 7.14 (sept, J = 2.4Hz, 1H), 7.37 (d, J = 8.0Hz, 1H), 9.12 (s, 1H); <sup>13</sup>C NMR: 28.1, 28.2, 28.6, 31.6, 38.3, 55.2, 67.8, 111.2, 113.8, 115.3, 119.5, 120.0, 122.5, 126.4, 128.9, 130.5, 136.6, 136.9, 158.1, 206.5, 207.0; IR (cm<sup>-1</sup>): 3379, 3049, 2996, 2932, 2861, 2831, 2698, 1610, 1511, 1457, 1433, 1414, 1354, 1293, 1244, 1210, 1176, 1147, 1110, 1028, 962, 830, 747, 682, 578; HRMS m/z (ESI) calcd for C<sub>23</sub>H<sub>23</sub>NNaO<sub>3</sub> [M + Na]<sup>+</sup> 384.1576 found 384.1568.

**References**

1. Y. Gu, R. De Sousa, G. Frapper, C. Bachmann, J. Barrault, F. Jérôme, *Green Chem.* **2009**, *11*, 1968-1972.
2. Y. Gu, J. Barrault, F. Jerome, *Adv. Synth. Catal.* **2009**, *351*, 3269-3278.

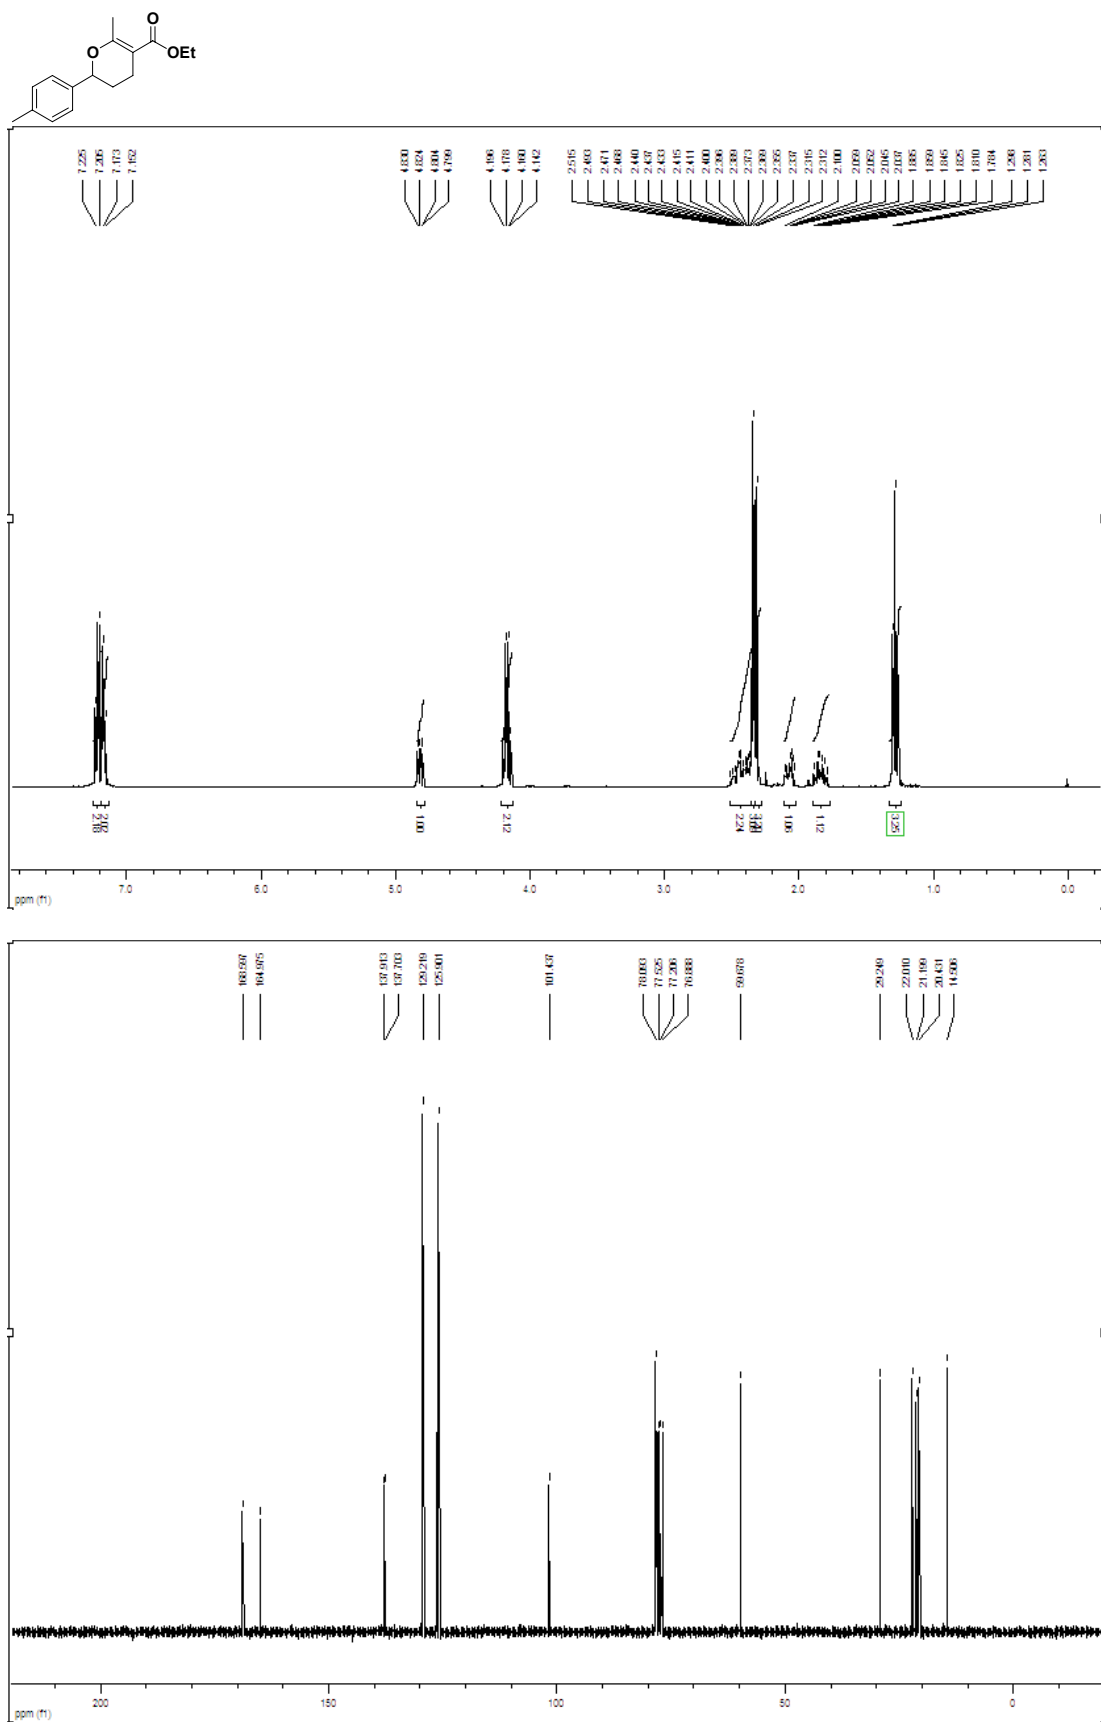





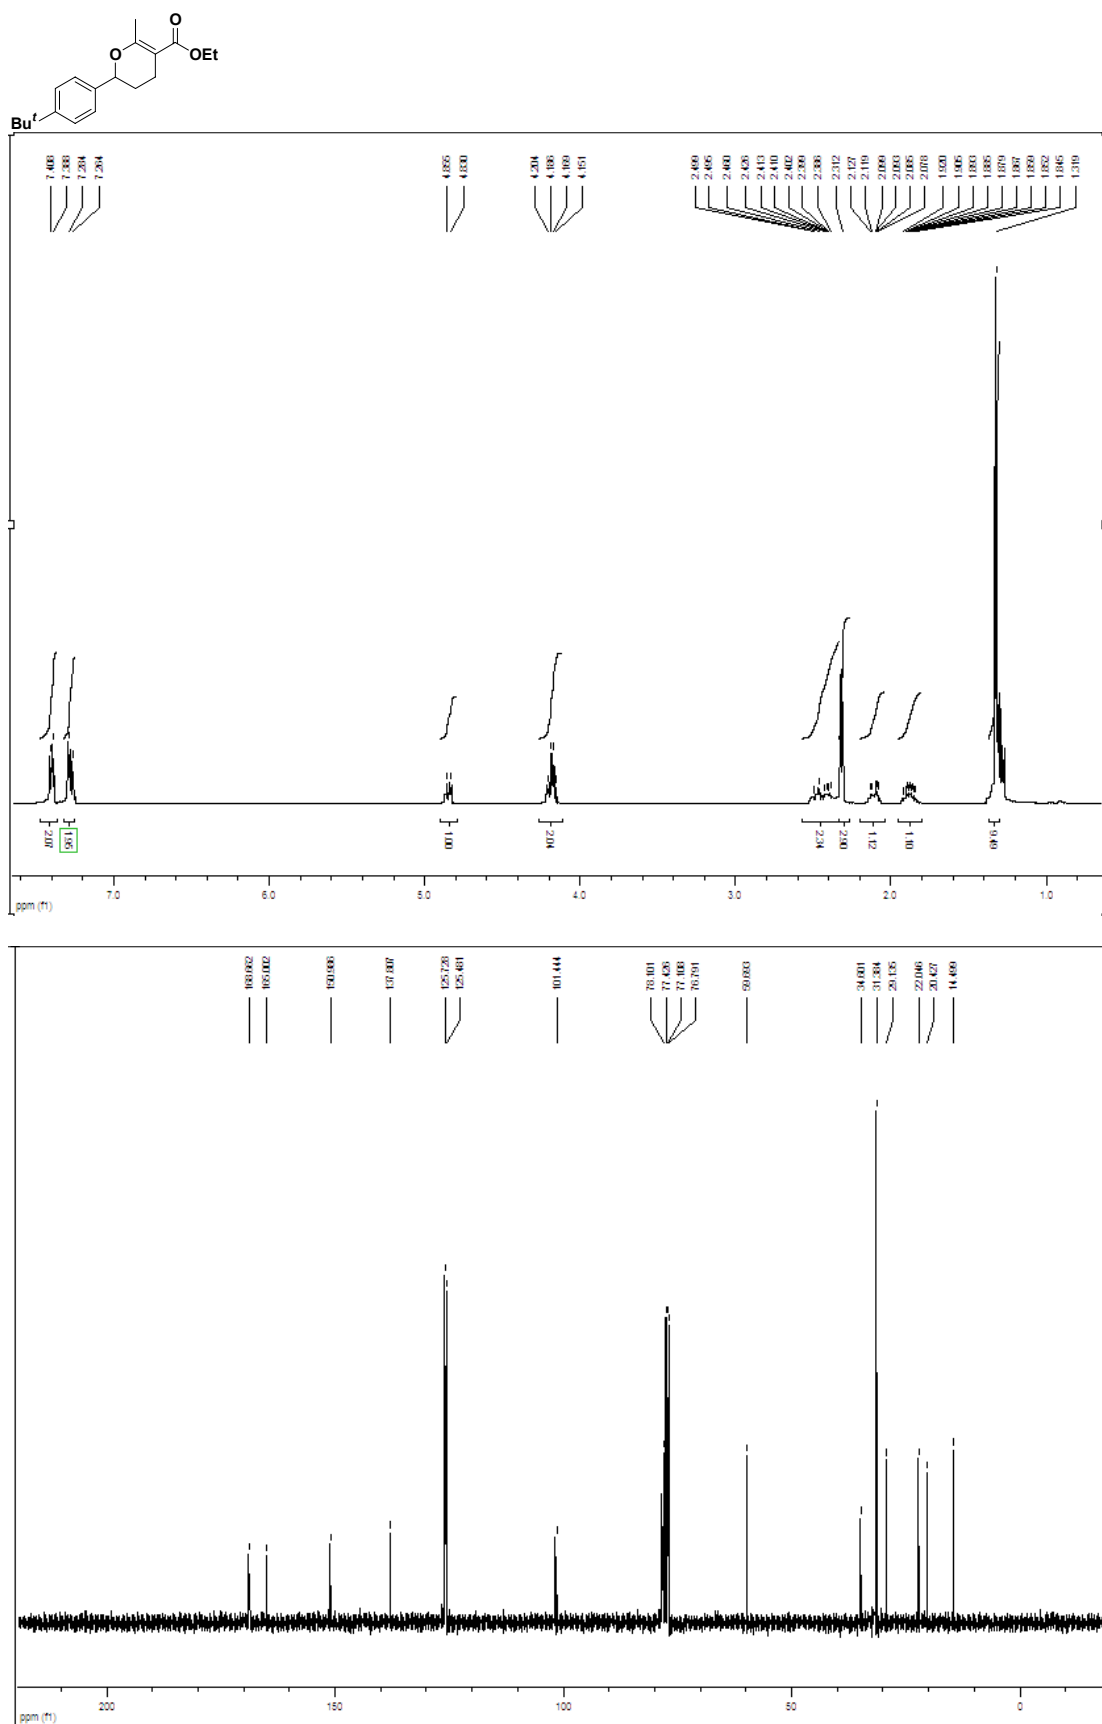

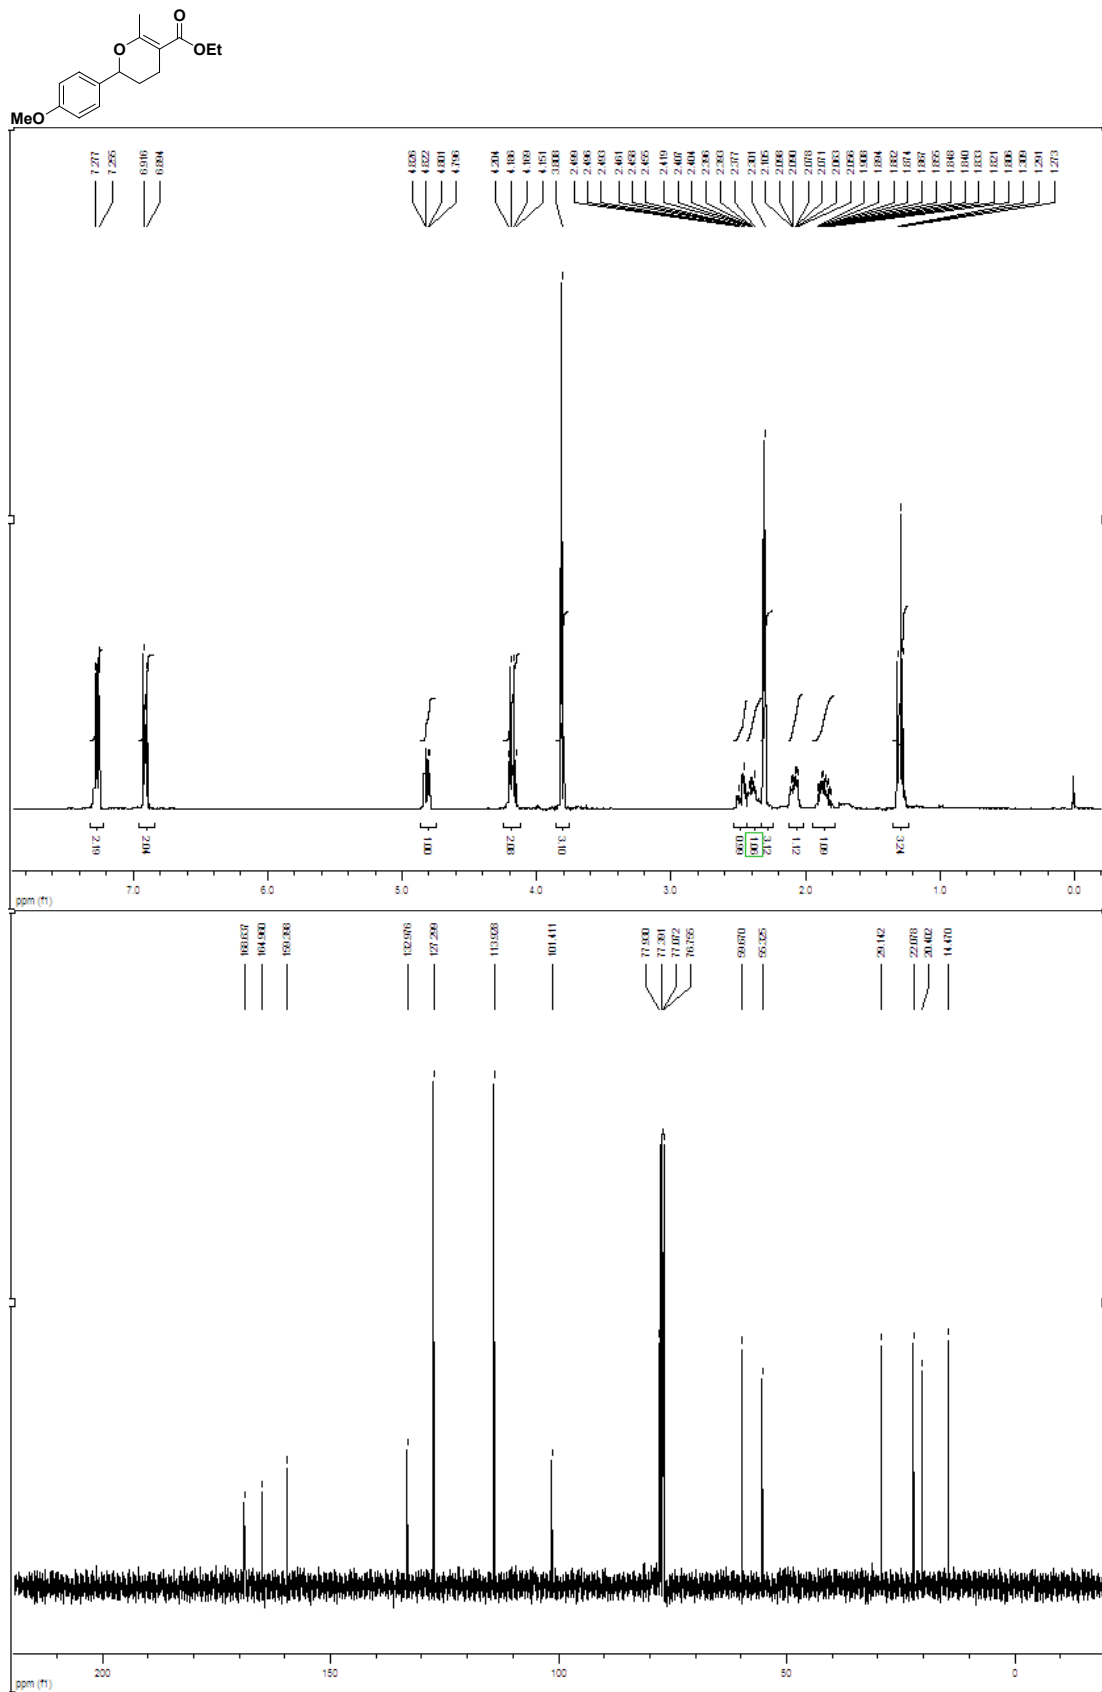













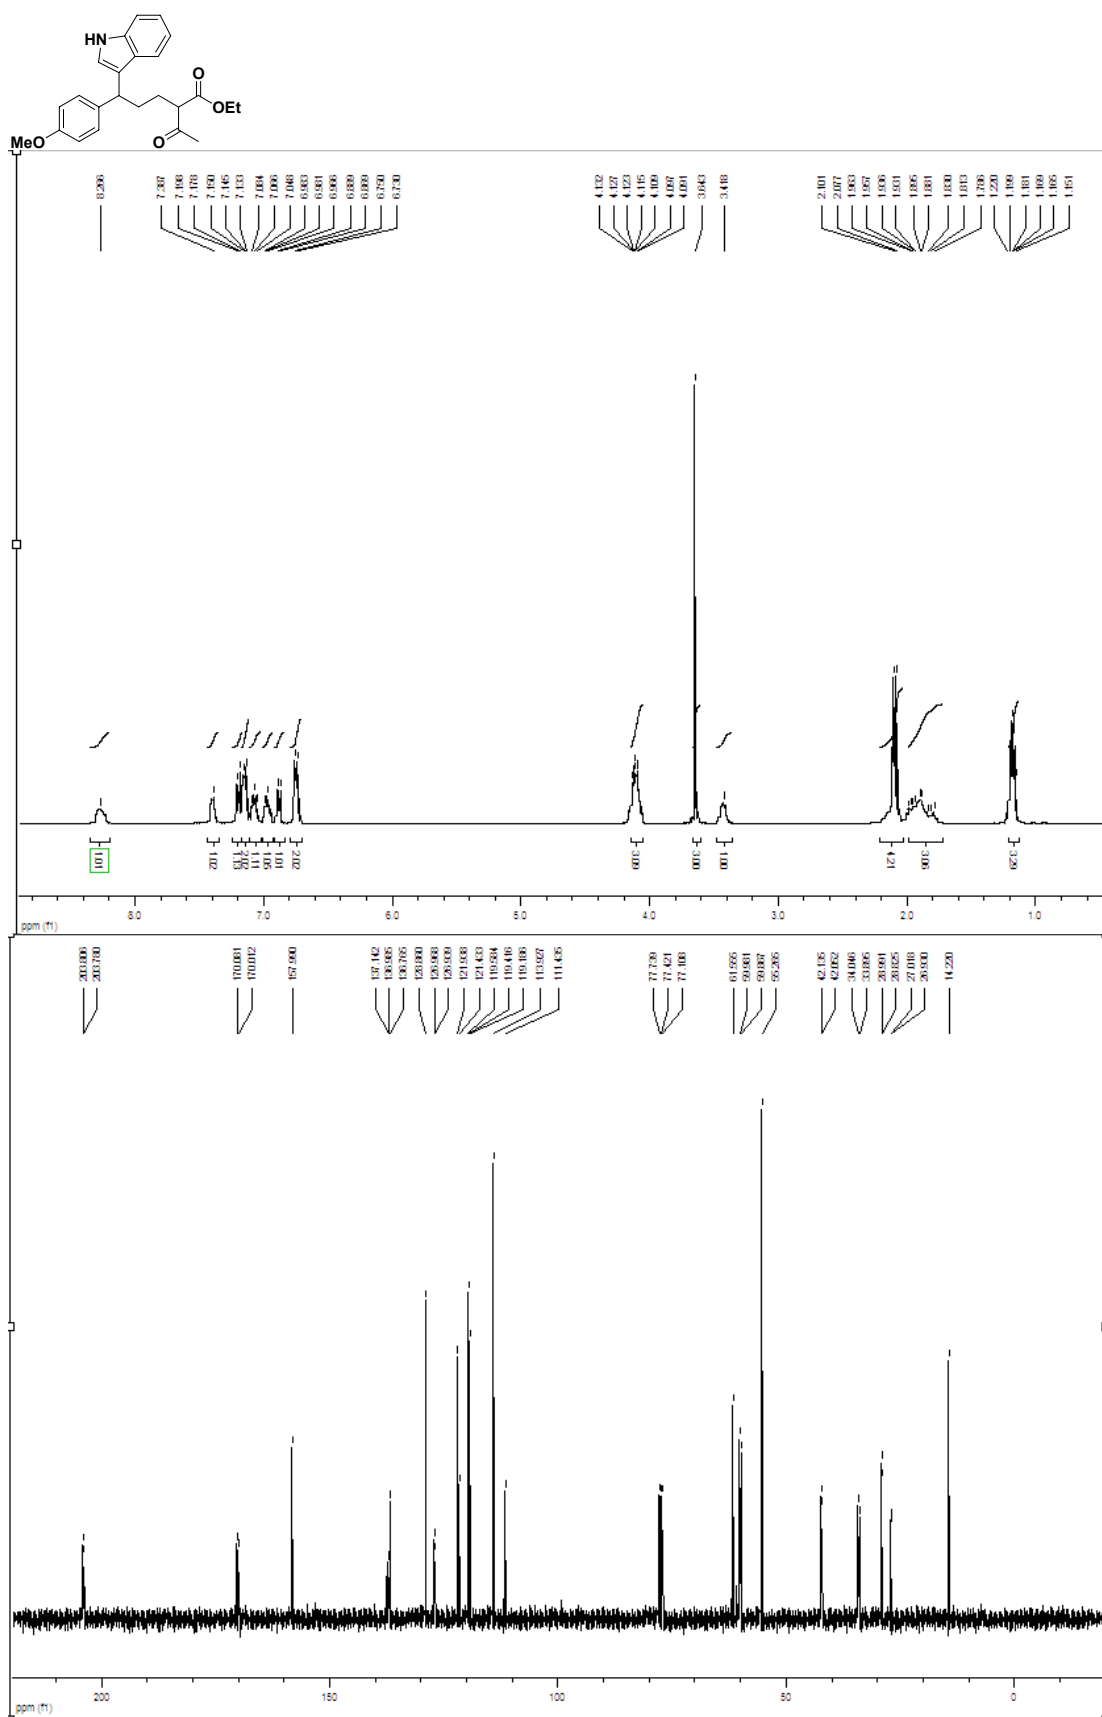



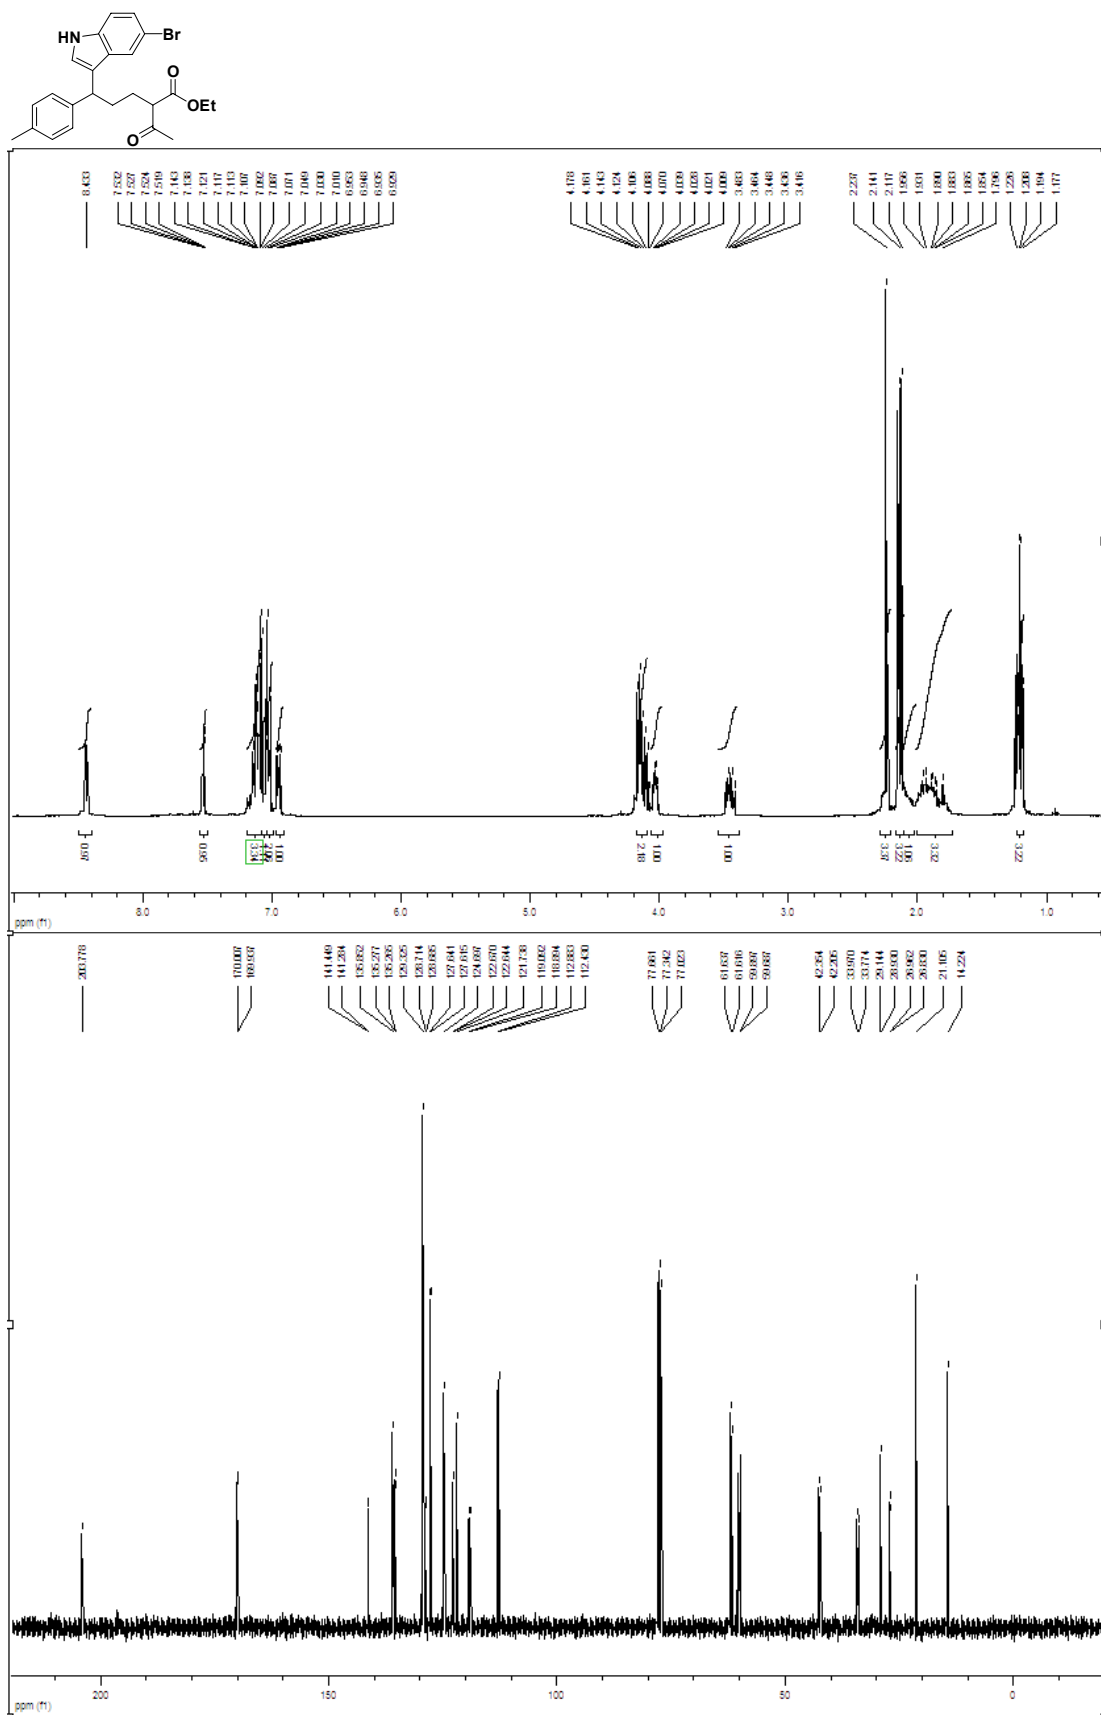









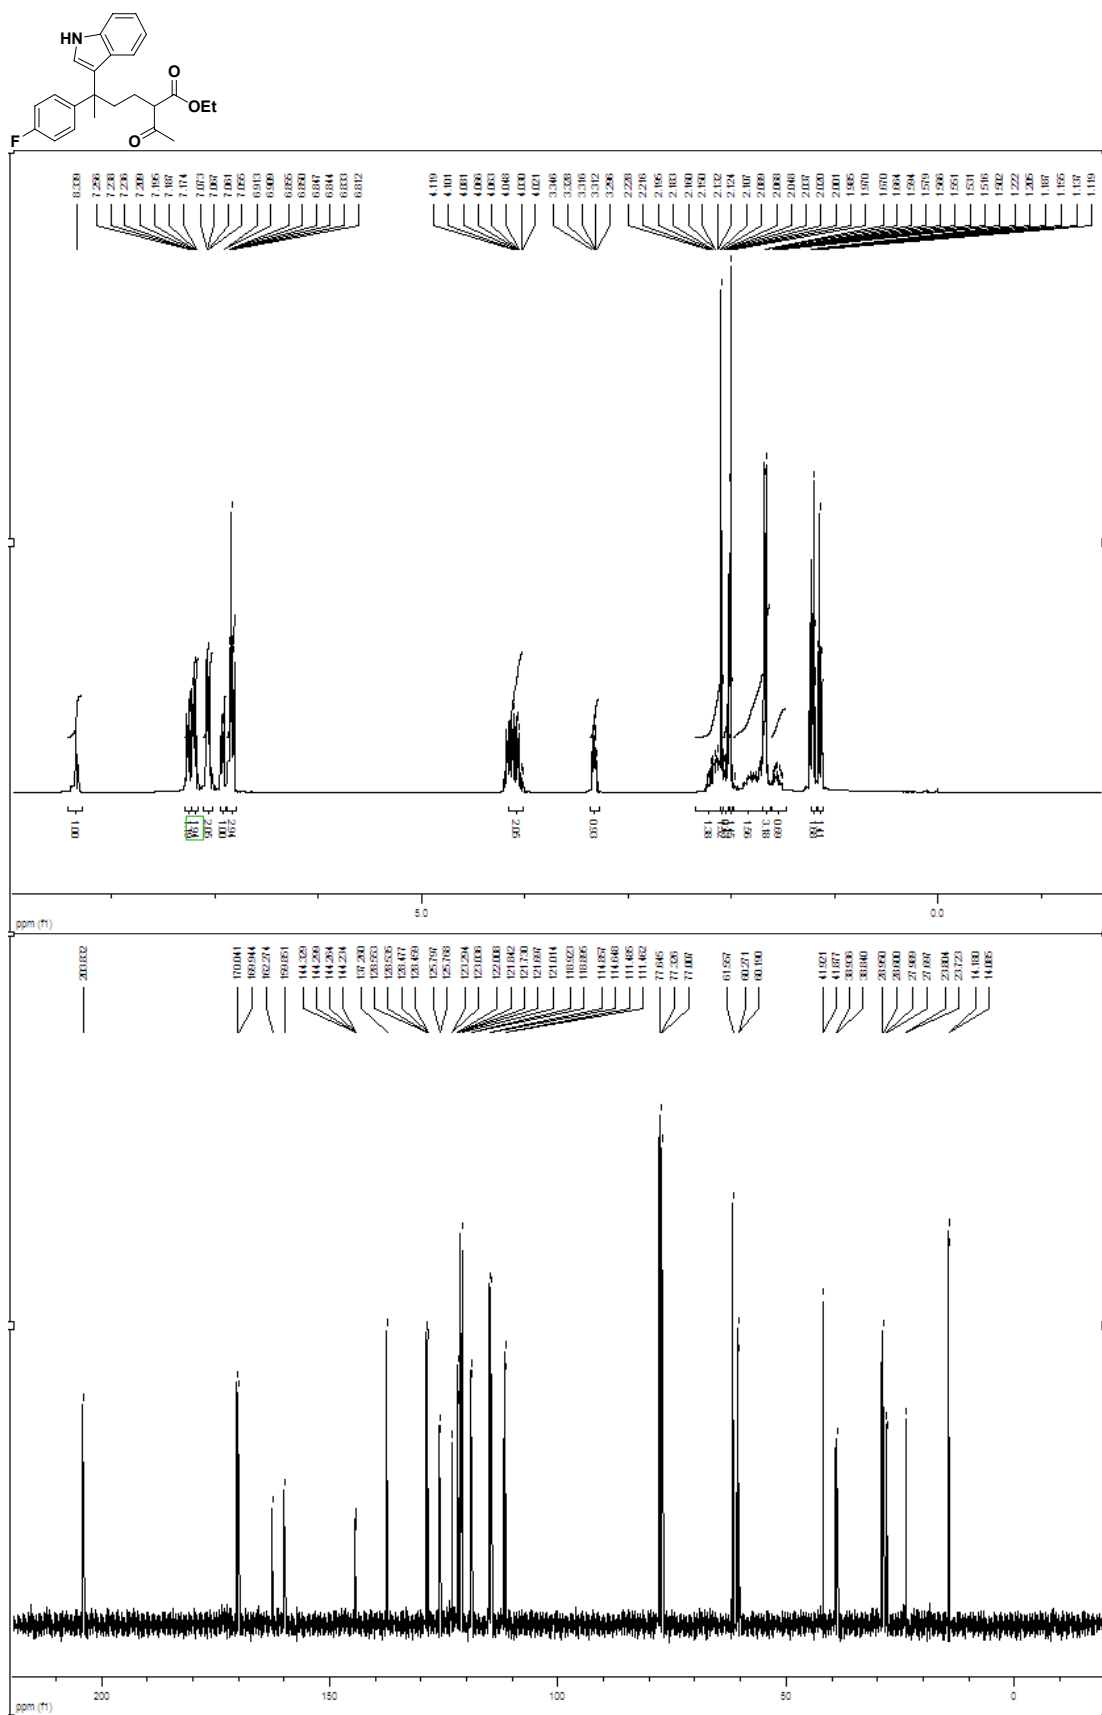

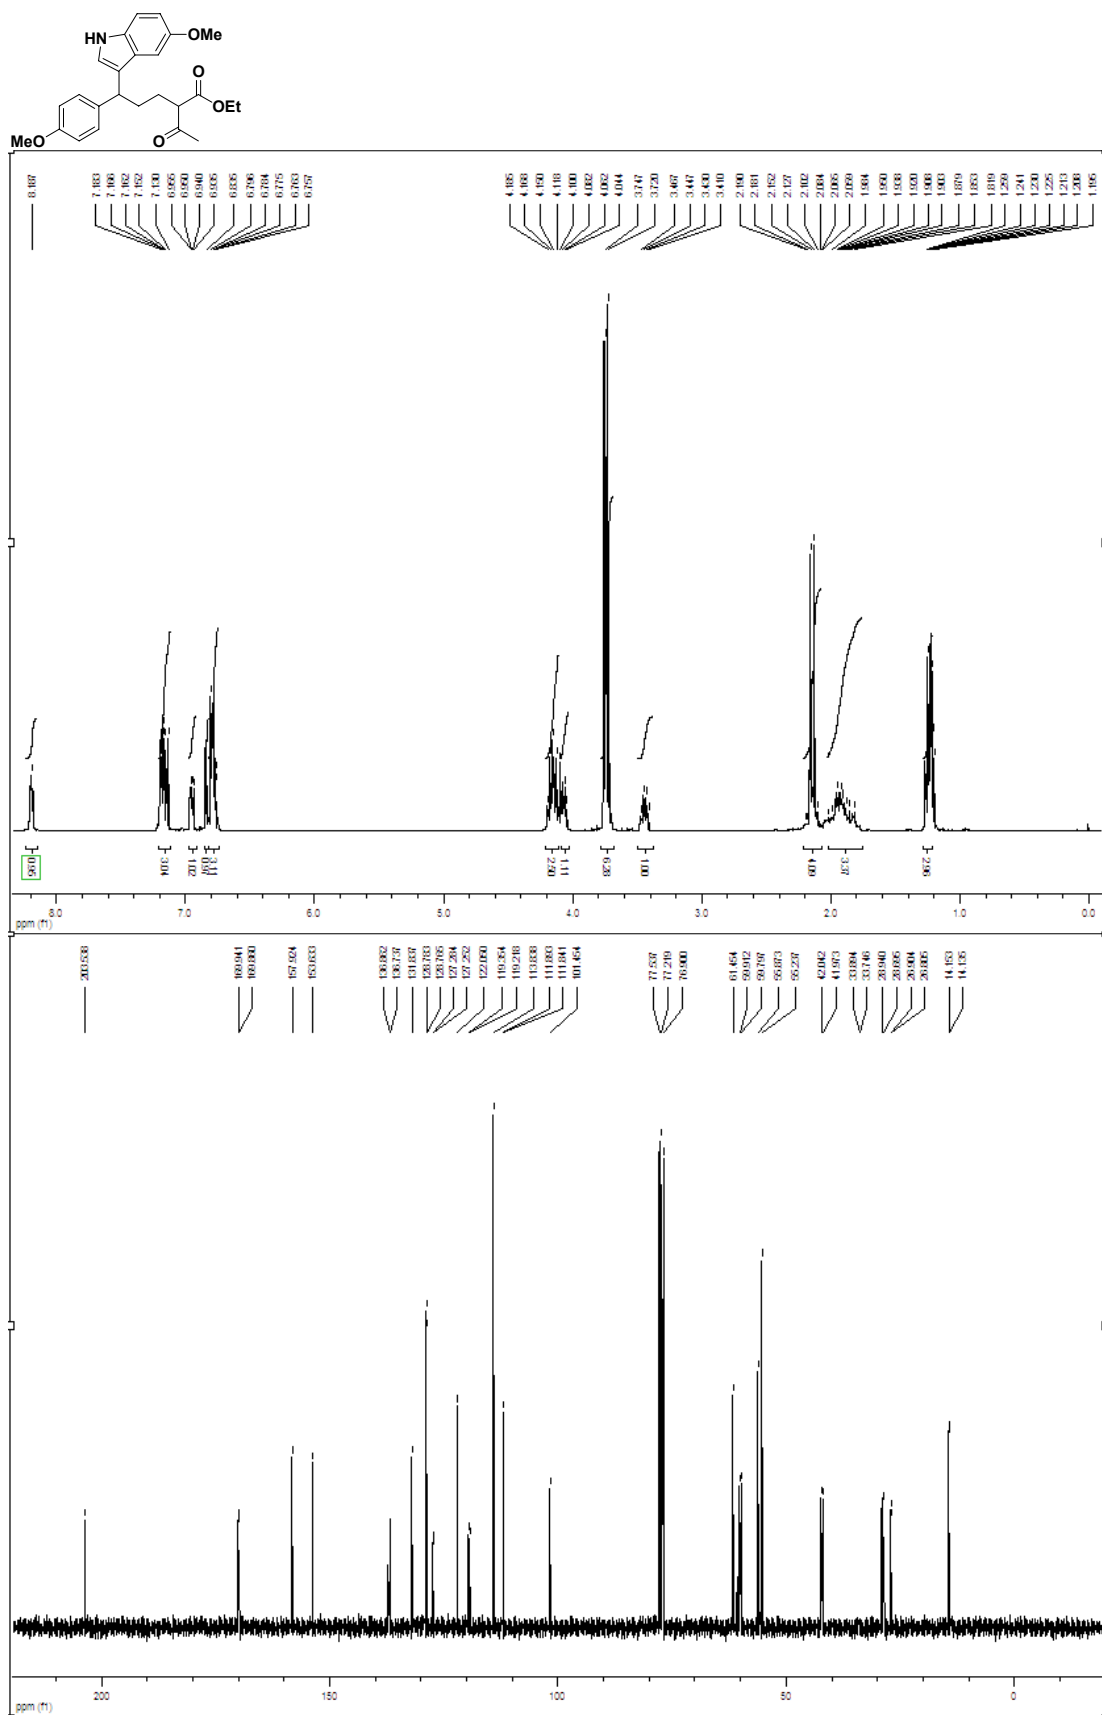

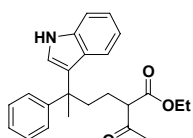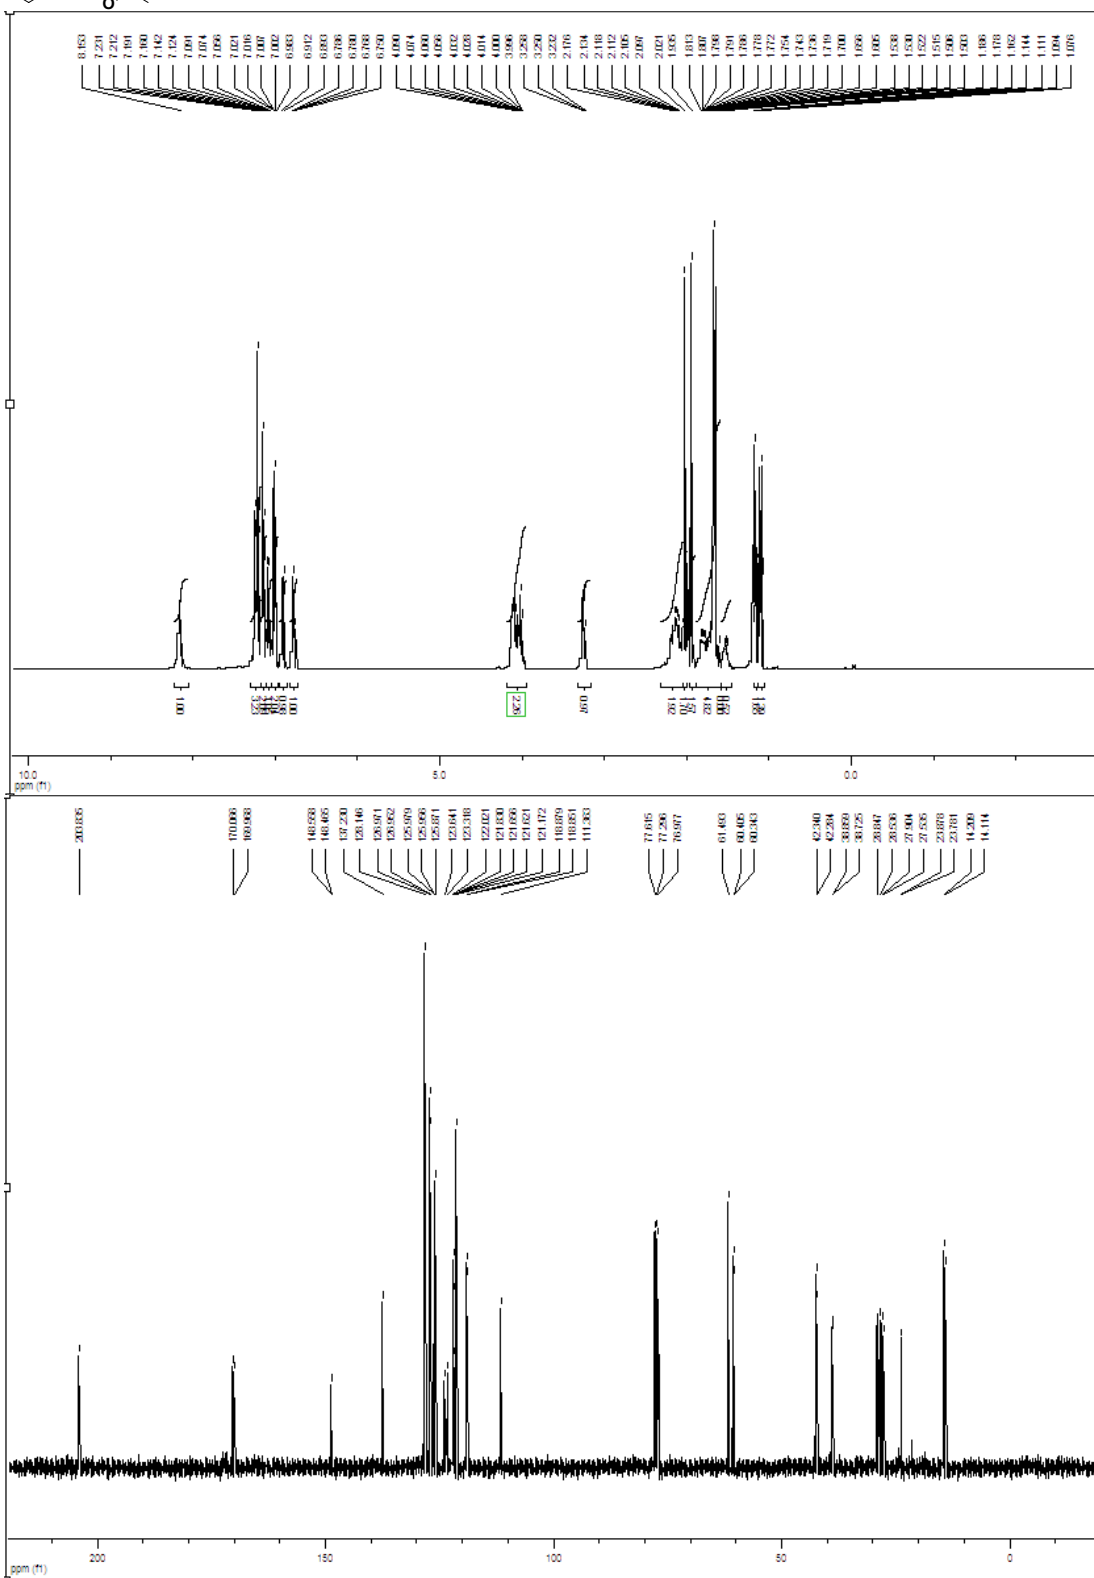



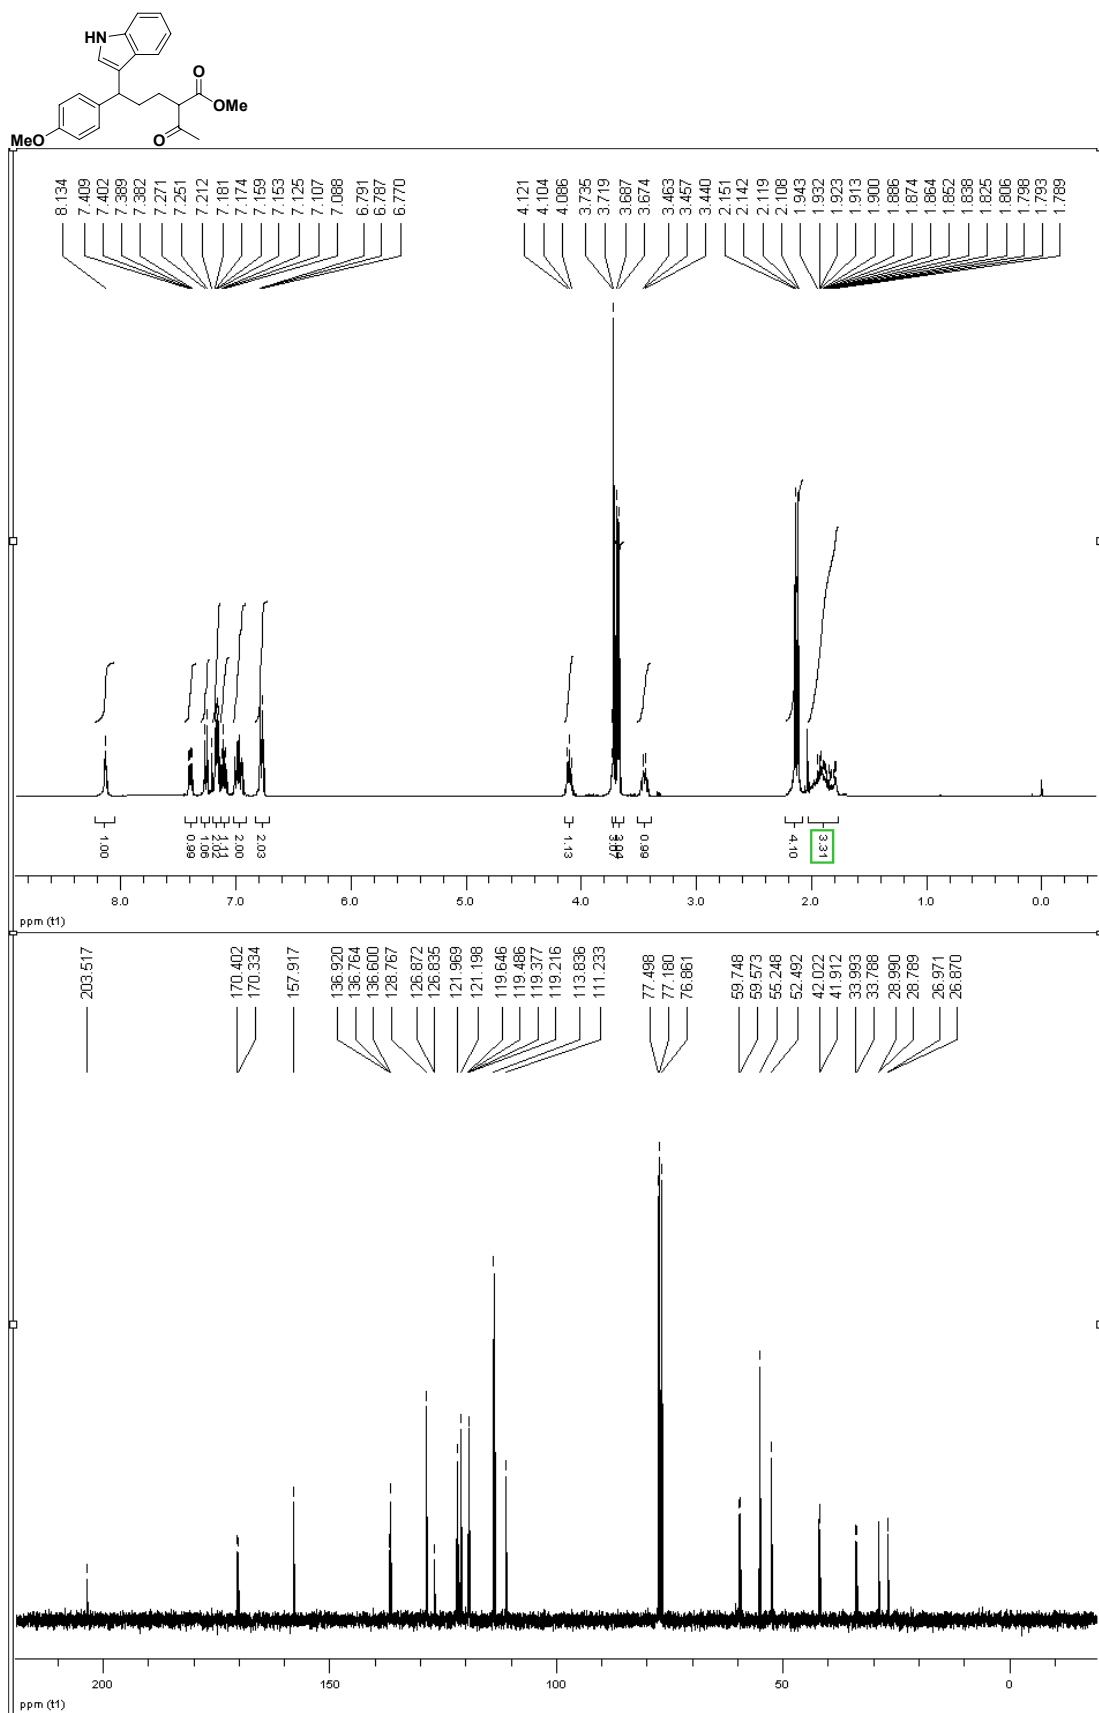

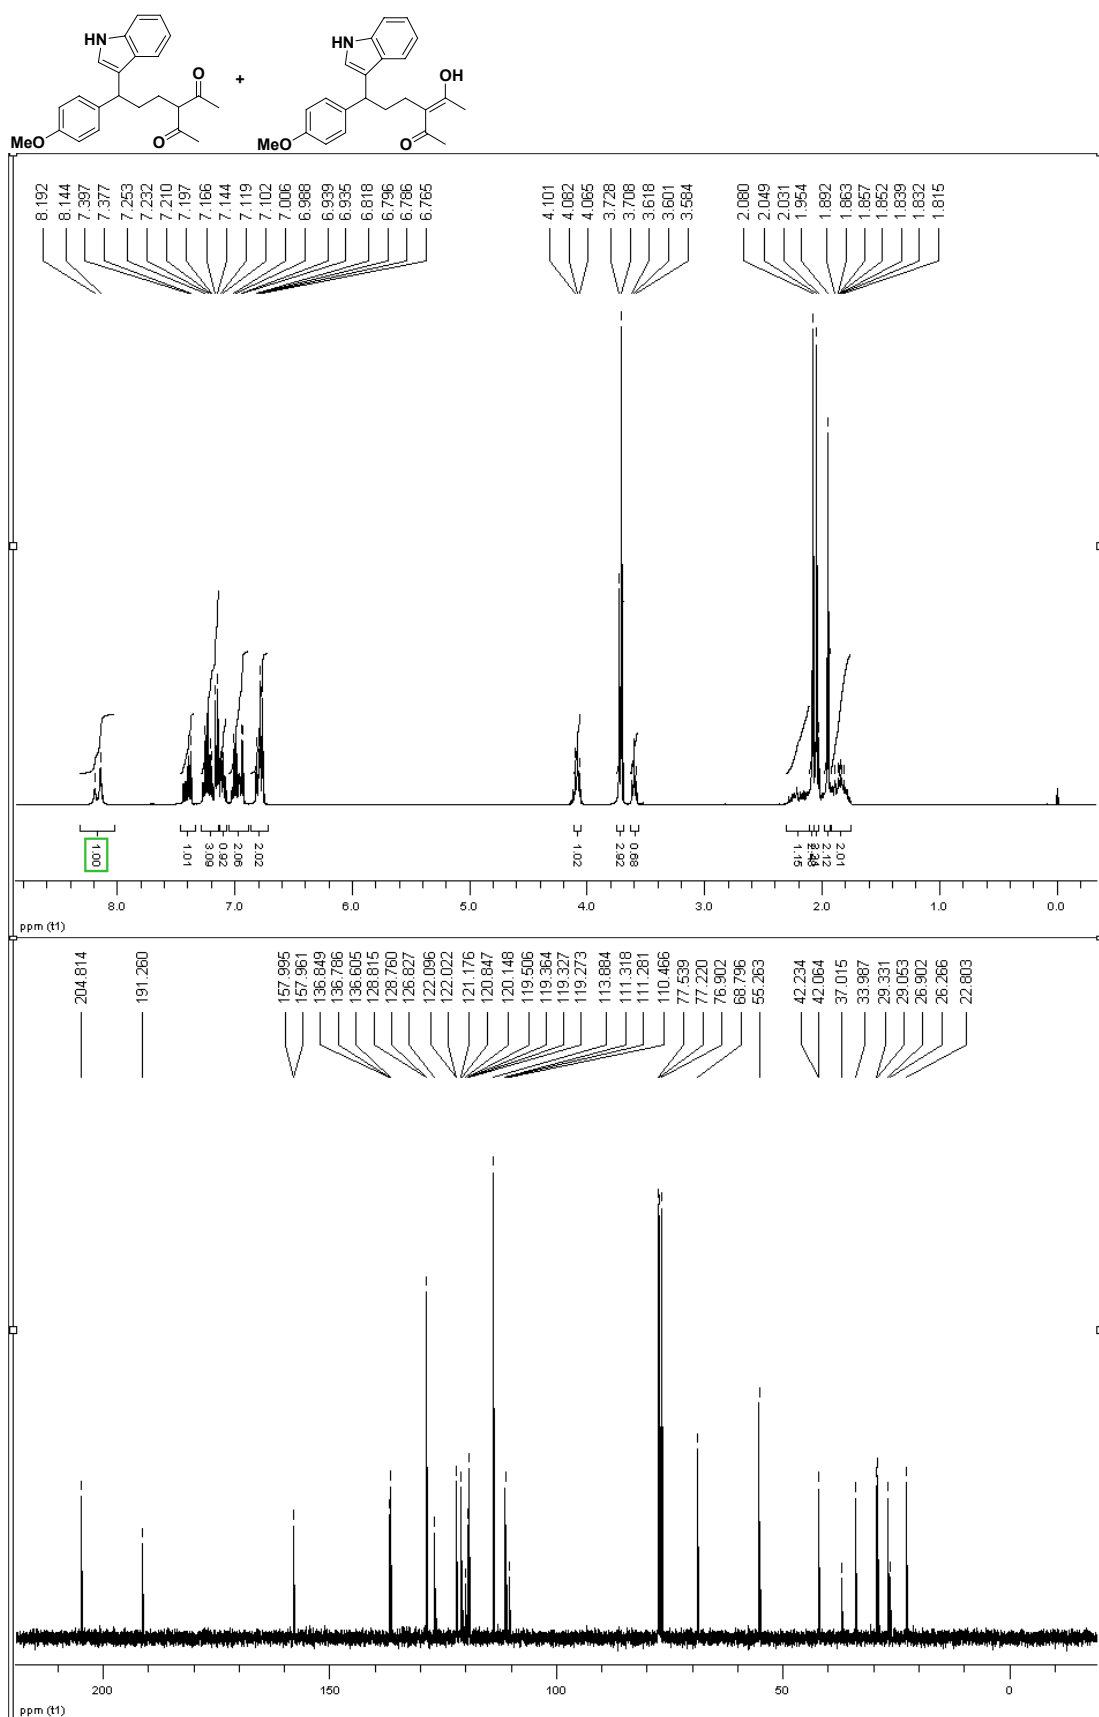



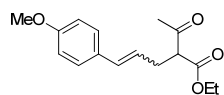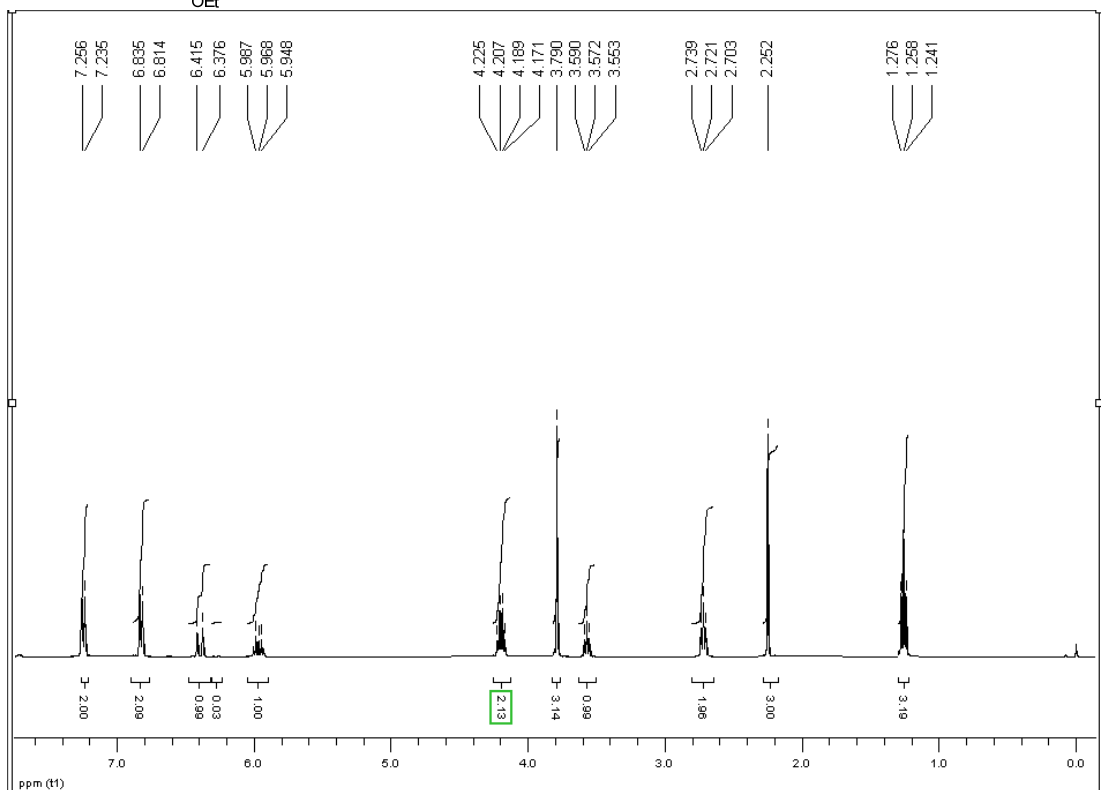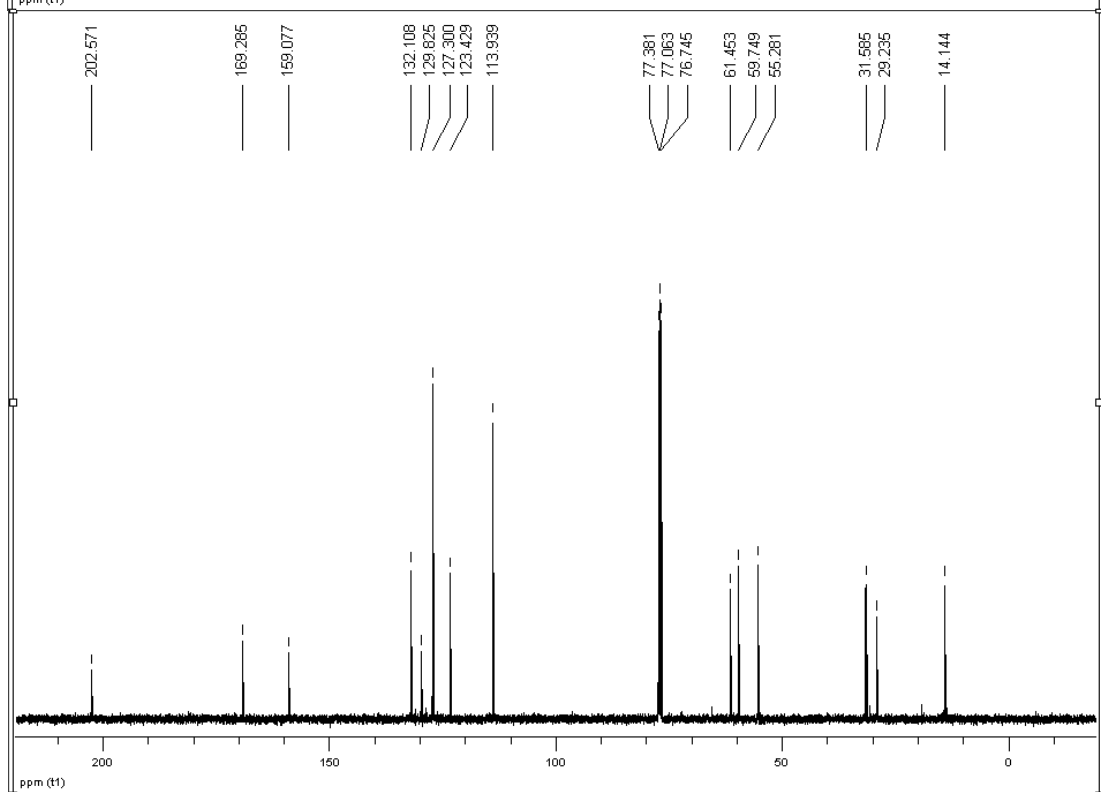

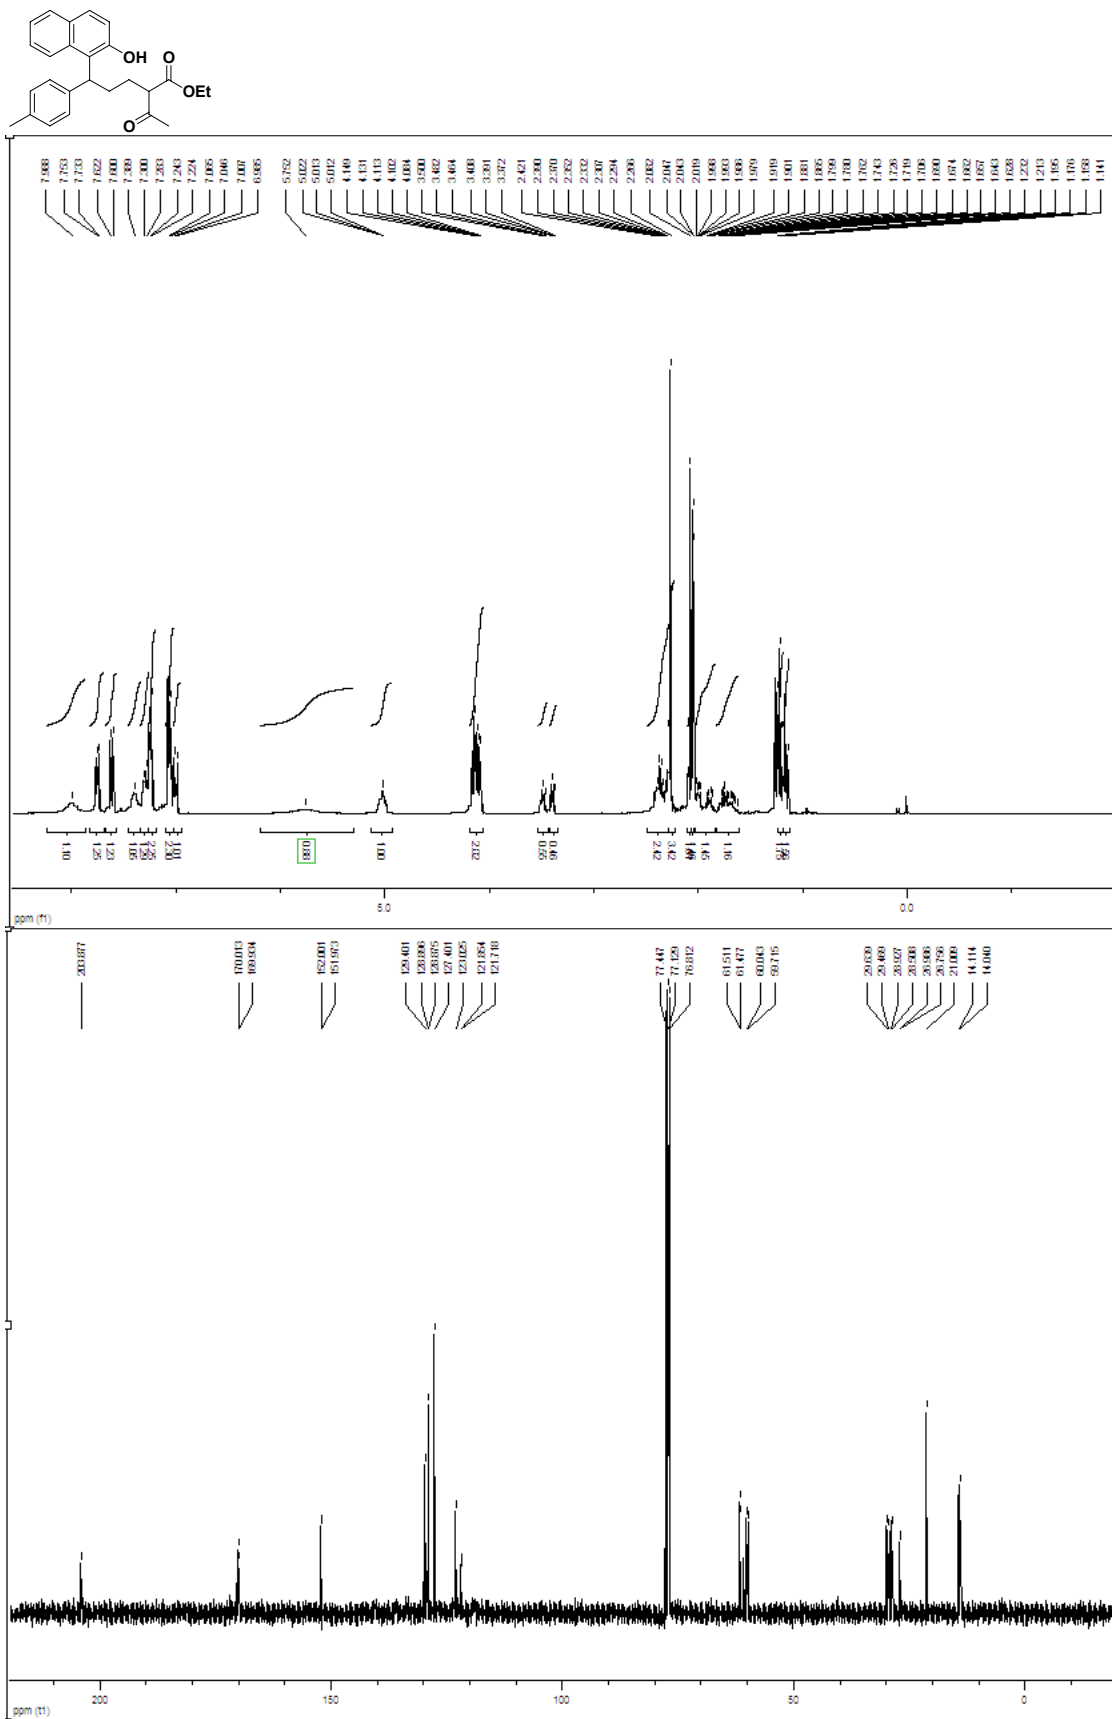

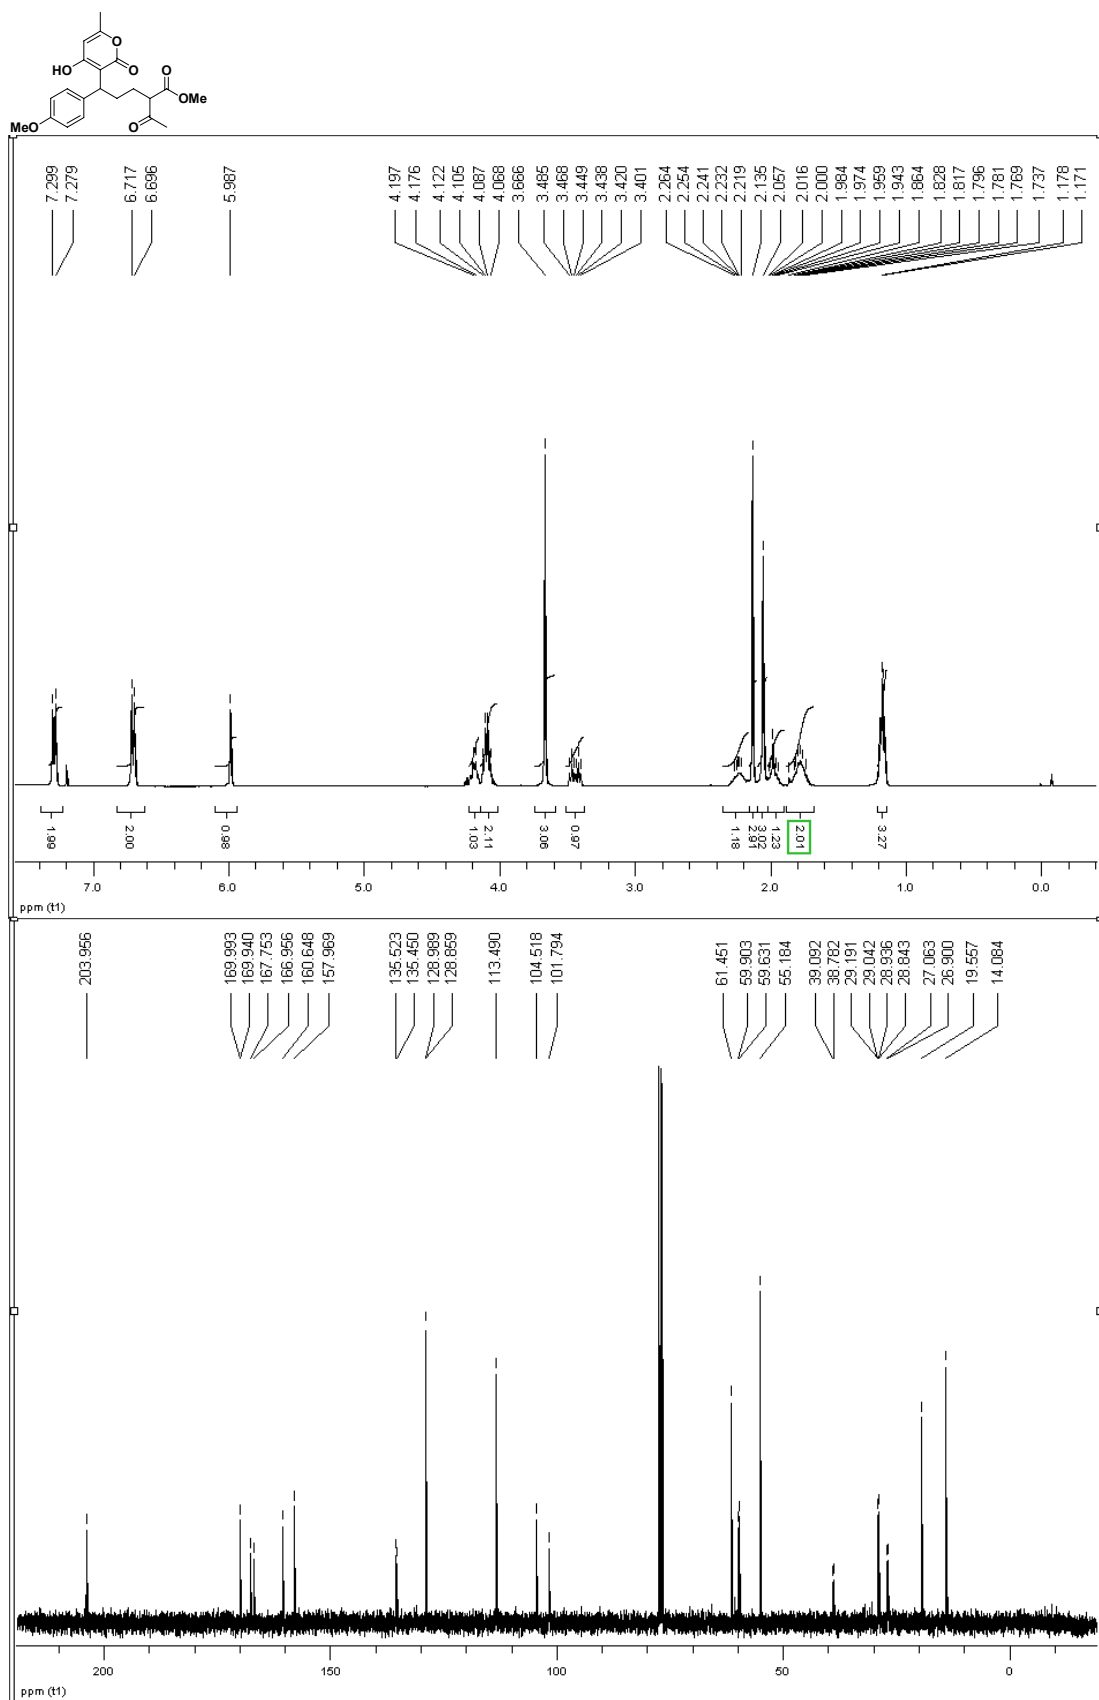

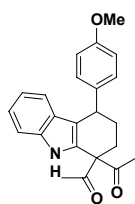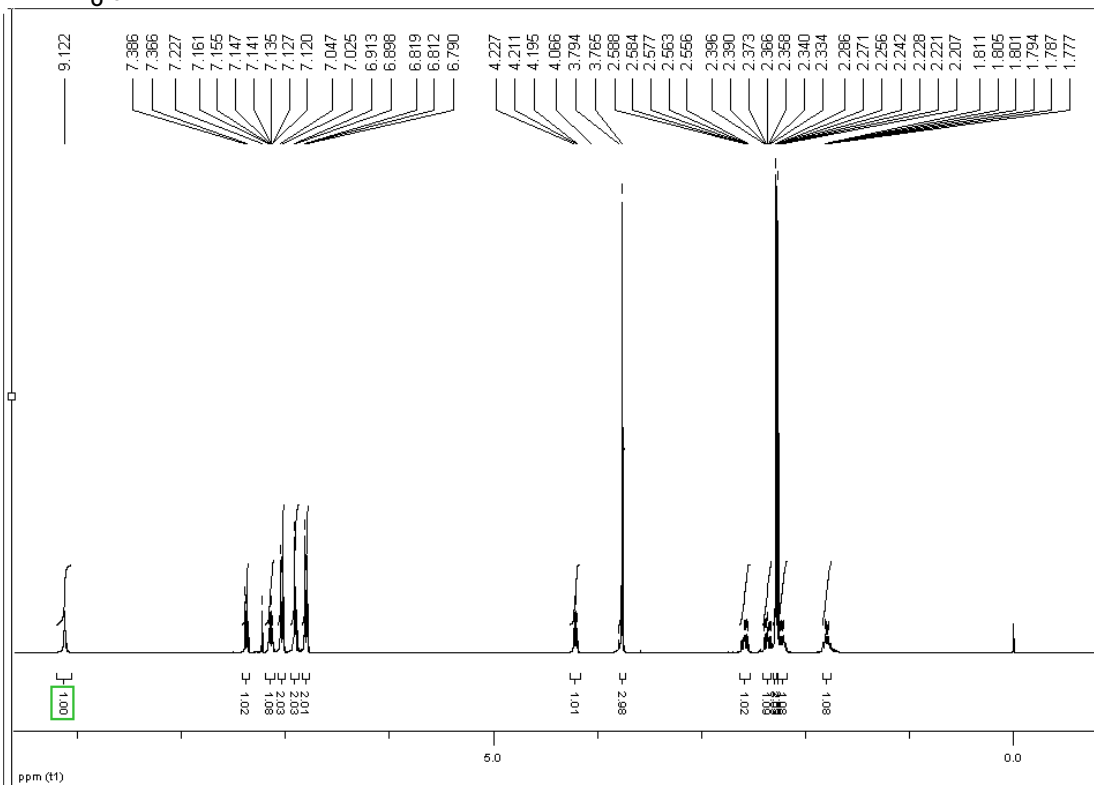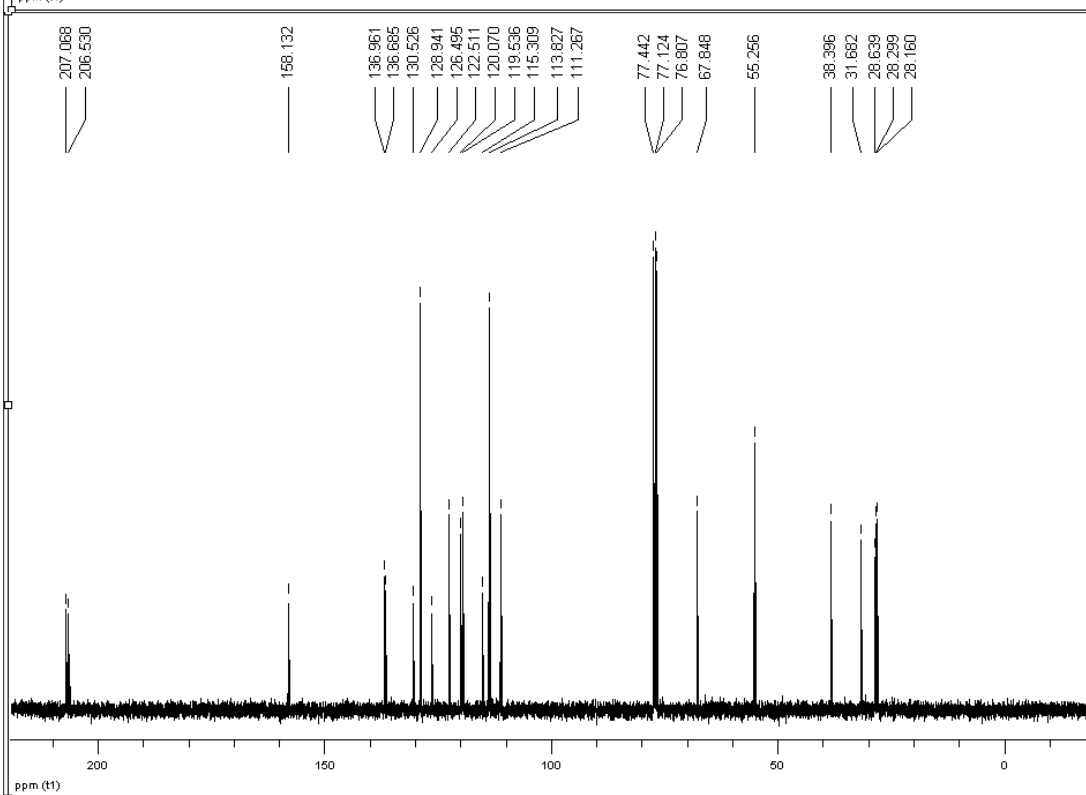

Supplement: c1cc10355e.pdf [file c1cc10355e.pdf]
